1 New insights into human nostril microbiome from the *expanded* Human Oral  
2 Microbiome Database (eHOMD): a resource for the microbiome of the human  
3 aerodigestive tract

4  
5 Isabel F. Escapa<sup>a,b</sup>, Tsute Chen<sup>a,b\*</sup>, Yanmei Huang<sup>a,b\*</sup>, Prasad Gajare<sup>a</sup>, Floyd E.  
6 Dewhirst<sup>a,b</sup>, Katherine P. Lemon<sup>a,c#</sup>

7  
8 <sup>a</sup>The Forsyth Institute (Microbiology), Cambridge, Massachusetts, USA

9 <sup>b</sup>Department of Oral Medicine, Infection & Immunity, Harvard School of Dental  
10 Medicine, Boston, Massachusetts, USA

11 <sup>c</sup>Division of Infectious Diseases, Boston Children's Hospital, Harvard Medical School,  
12 Boston, Massachusetts, USA

13

14 Running Title: eHOMD: a respiratory tract and oral microbial database

15 \* T.C. and Y.H. contributed equally to this work.

16 # Address correspondence to Katherine P. Lemon, [klemon@forsyth.org](mailto:klemon@forsyth.org)

17 key words: Microbiota; Microbiome; Metagenomics; Nasal; Nostril; Nares; Pharynx;

18 Mouth; Esophagus; Sinus; Ribosomal, 16S; Nucleic Acid; Databases; Algorithms;

19 Sequence Analysis; *Staphylococcus*; *Corynebacterium*; *Dolosigranulum*; *Lawsonella*

20 abstract word count: 249

21 text word count: 5905

## 22 **ABSTRACT**

23 The *expanded* Human Oral Microbiome Database (eHOMD) is a comprehensive  
24 microbiome database for sites along the human aerodigestive tract that revealed new  
25 insights into the nostril microbiome. The eHOMD provides well-curated 16S rRNA gene  
26 reference sequences linked to available genomes and enables assignment of species-  
27 level taxonomy to most NextGeneration sequences derived from diverse aerodigestive  
28 tract sites, including the nasal passages, sinuses, throat, esophagus and mouth. Using  
29 Minimum Entropy Decomposition coupled with the RDP Classifier and our eHOMD V1-  
30 V3 training set, we reanalyzed 16S rRNA V1-V3 sequences from the nostrils of 210  
31 Human Microbiome Project participants at the species level revealing four key insights.  
32 First, we discovered that *Lawsonella clevelandensis*, a recently named bacterium, and  
33 *Neisseriaceae* [G-1] HMT-174, a previously unrecognized bacterium, are common in  
34 adult nostrils. Second, just 19 species accounted for 90% of the total sequences from all  
35 participants. Third, one of these 19 belonged to a currently uncultivated genus. Fourth,  
36 for 94% of the participants, two to ten species constituted 90% of their sequences,  
37 indicating nostril microbiome may be represented by limited consortia. These insights  
38 highlight the strengths of the nostril microbiome as a model system for studying  
39 interspecies interactions and microbiome function. Also, in this cohort, three common  
40 nasal species (*Dolosigranulum pigrum* and two *Corynebacterium* species) showed  
41 positive differential abundance when the pathobiont *Staphylococcus aureus* was  
42 absent, generating hypotheses regarding colonization resistance. By facilitating  
43 species-level taxonomic assignment to microbes from the human aerodigestive tract,  
44 the eHOMD is a vital resource enhancing clinical relevance of microbiome studies.

45

## 46 **IMPORTANCE**

47 The eHOMD ([ehomd.org](http://ehomd.org)) is a valuable resource for researchers, from basic to clinical,  
48 who study the microbiomes, and the individual microbes, in health and disease of body  
49 sites in the human aerodigestive tract, which includes the nasal passages, sinuses,  
50 throat, esophagus and mouth, and the lower respiratory tract. The eHOMD is an actively  
51 curated, web-based, open-access resource. eHOMD provides the following: (1)  
52 species-level taxonomy based on grouping 16S rRNA gene sequences at 98.5%  
53 identity, (2) a systematic naming scheme for unnamed and/or uncultivated microbial  
54 taxa, (3) reference genomes to facilitate metagenomic, metatranscriptomic and  
55 proteomic studies and (4) convenient cross-links to other databases (e.g., PubMed and  
56 Entrez). By facilitating the assignment of species names to sequences, the eHOMD is a  
57 vital resource for enhancing the clinical relevance of 16S rRNA gene-based microbiome  
58 studies, as well as metagenomic studies.

59

## 60 **INTRODUCTION**

61 The human aerodigestive tract, which includes the oral cavity, pharynx, esophagus,  
62 nasal passages and sinuses, commonly harbors both harmless and pathogenic  
63 bacterial species of the same genus. Therefore, optimizing the clinical relevance of  
64 microbiome studies for body sites within the aerodigestive tract requires sequence  
65 identification at the species or, at least, subgenus level. Understanding the composition  
66 and function of the microbiome of the aerodigestive tract is important for understanding  
67 human health and disease since aerodigestive tract sites are often colonized by

68 common bacterial pathogens and are associated with prevalent diseases characterized  
69 by dysbiosis.

70 The reductions in the cost of NextGeneration DNA Sequencing (NGS) combined with  
71 the increasing ease of determining bacterial community composition using short NGS-  
72 generated 16S rRNA gene fragments now make this a practical approach for large-  
73 scale molecular epidemiological, clinical and translational studies (1). Optimal clinical  
74 relevance of such studies requires at least species-level identification (2); however, to  
75 date, 16S rRNA gene-tag studies of the human microbiome are overwhelmingly limited  
76 to genus-level resolution. For example, many studies of nasal microbiota fail to  
77 distinguish medically important pathogens, e.g., *Staphylococcus aureus*, from generally  
78 harmless members of the same genus, e.g., *Staphylococcus epidermidis*. For many  
79 bacterial taxa, newer computational methods, e.g., Minimum Entropy Decomposition  
80 (MED), an unsupervised form of oligotyping (3), and DADA2 (4), parse NGS-generated  
81 short 16S rRNA gene sequences to species-level, sometimes strain-level, resolution.  
82 However, to achieve species-level taxonomy assignment for the resulting  
83 oligotypes/phylotypes, these methods must be used in conjunction with a high-  
84 resolution 16S rRNA gene taxonomic database and a classifying algorithm. Similarly,  
85 metagenomic sequencing provides species- and, often, strain-level resolution when  
86 coupled with a reference database that includes genomes from multiple strains for each  
87 species. For the mouth, the HOMD (5, 6) has enabled analysis/reanalysis of oral 16S  
88 rRNA gene short-fragment datasets with these new computational tools, revealing  
89 microbe-microbe and host-microbe species-level relationships (7-9), and has been a  
90 resource for easy access to genomes from which to build reference sets for

91 metagenomic and metatranscriptomic studies. In eHOMD, we have considerably  
92 expanded the number of genomes linked to aerodigestive tract taxa. Thus, the eHOMD  
93 ([ehomd.org](http://ehomd.org)) is a comprehensive web-based resource enabling the broad community of  
94 researchers studying the nasal passages, sinuses, throat, esophagus and mouth to  
95 leverage newer high-resolution approaches to study the microbiome of aerodigestive  
96 tract body sites in both health and disease. The eHOMD should also serve as an  
97 effective resource for lower respiratory tract (LRT) microbiome studies based on the  
98 breadth of taxa included, and that many LRT microbes are found in the mouth, pharynx  
99 and nasal passages (10).

100 The eHOMD also facilitates rapid comparison of 16S rRNA gene sequences from  
101 studies worldwide by providing a systematic provisional naming scheme for unnamed  
102 taxa identified through sequencing (6). Each high-resolution taxon in eHOMD, as  
103 defined by 98.5% sequence identity across close-to-full-length 16S rRNA gene  
104 sequences, is assigned a unique Human Microbial Taxon (HMT) number that can be  
105 used to search and retrieve that sequence-based taxon from any dataset or database.

106 This stable provisional taxonomic scheme for unnamed and uncultivated taxa is one of  
107 the strengths of eHOMD, since taxon numbers stay the same even when names  
108 change.

109 Here, in section I, we describe the process of generating the eHOMDv15.1 ([ehomd.org](http://ehomd.org)),  
110 its utility using both 16S rRNA gene clone library and short-read datasets and, in section  
111 II, new discoveries about the nostril microbiome based on analysis using the eHOMD.

112

113 **RESULTS and DISCUSSION**

114 **I. The eHOMD is a Resource for Microbiome Research on the Human Upper**  
115 **Digestive and Respiratory Tracts.**

116 As described below, the eHOMD ([ehomd.org](http://ehomd.org)) is a comprehensive, actively curated,  
117 web-based resource open to the entire scientific community that classifies 16S rRNA  
118 gene sequences at a high resolution (98.5% sequence identity). Further, the eHOMD  
119 provides a systematic provisional naming scheme for as-yet unnamed/uncultivated taxa  
120 and a resource for easily searching available genomes for included taxa, thereby,  
121 facilitating the identification of aerodigestive and lower respiratory tract bacteria and  
122 providing phylogenetic ([http://ehomd.org/index.php?name=HOMD&show\\_tree=\\_](http://ehomd.org/index.php?name=HOMD&show_tree=_)), genomic,  
123 phenotypic, clinical and bibliographic information for these microbes.

124 **The eHOMD captures the breadth of diversity of the human nostril microbiome.**

125 Here we describe the generation of eHOMDv15.1, which performed as well or better  
126 than four other commonly used 16S rRNA gene databases (SILVA128, RDP16, NCBI  
127 16S and Greengenes GOLD) in assigning species-level taxonomy via blastn to  
128 sequences in a dataset of nostril-derived 16S rRNA gene clones (Table 1) and short-  
129 read fragments (Table 2). Species-level taxonomy assignment was defined as 98.5%  
130 identity with 98% coverage via blastn (based on analysis shown in Fig. S1). An initial  
131 analysis showed that the oral-focused HOMDv14.5 enabled species-level taxonomic  
132 assignment of only 50.2% of the 44,374 16S rRNA gene clones from nostril (anterior  
133 nares) samples generated by Julie Segre, Heidi Kong and colleagues, henceforth the  
134 SKn dataset (Table 1) (11-16). To expand HOMD to be a resource for the microbiomes  
135 of the entire human aerodigestive tract, we started with the addition of nasal- and sinus-  
136 associated bacterial species. As illustrated in Figure 1, and described in detail in the

137 methods, we compiled a list of candidate nasal and sinus species gleaned from culture-  
138 dependent studies (17-19) plus anaerobes cultivated from cystic fibrosis sputa (20)  
139 (Table S1A). To assess which of these candidate species are most likely to be common  
140 members of the nasal microbiome, we used blastn to identify those taxa present in the  
141 SKn dataset. We then added one or two representative close-to-full-length 16S rRNA  
142 gene sequences (eHOMDrefs) for each of these taxa to a provisional expanded  
143 database (Fig. 1A). Using blastn, we assayed how well this provisional eHOMDv15.01  
144 captured clones in the SKn dataset (Table S1B). Examination of sequences in the SKn  
145 dataset that were not identified resulted in further addition of new HMTs generating the  
146 provisional eHOMDv15.02 (Fig. 1B and 1C). Next, we evaluated how well  
147 eHOMDv15.02 served to identify sequences in the SKn clone dataset using blastn (Fig.  
148 1D). To evaluate its performance for other datasets as compared to other databases,  
149 we took an iterative approach using blastn to evaluate the performance of  
150 eHOMDv15.02 against a set of three V1-V2 or V1-V3 16S rRNA gene short-read  
151 datasets (21-24) and two close-to-full-length 16S rRNA gene clone datasets from the  
152 aerodigestive tract in children and adults in health and disease (25-27) in comparison to  
153 three commonly used 16S rRNA gene databases: NCBI 16S Microbial (NCBI 16S) (28),  
154 RDP16 (29) and SILVA128 (30, 31) (Fig. 1E and Table S1C). (We dropped Greengenes  
155 GOLD (32) from these subsequent steps because it only identified 70% of the SKn  
156 clones in the initial analysis in Table 1.) These steps resulted in the generation of the  
157 provisional eHOMDv15.03. Further additions to include taxa that can be present on the  
158 skin of the nasal vestibule (nostril or nares samples) but which are more common at  
159 other skin sites resulted from using blastn to analyze the full Segre-Kong skin 16S rRNA

160 gene clone dataset, excluding nostrils, (the SKs dataset) (11-16) against both  
161 eHOMDv15.03 and SILVA128 (Fig. 1F and 1G). Based on these results, we generated  
162 the eHOMDv15.1, which identified 95.1% of the 16S rRNA gene reads in the SKn  
163 dataset outperforming the three other commonly used 16S rRNA gene databases  
164 (Table 1). Importantly, examination of the 16S rRNA gene phylogenetic tree of all  
165 eHOMDrefs in eHOMDv15.1 demonstrated that this expansion maintained the previous  
166 distinctions among oral taxa with the exception of *Streptococcus thermophiles*, which is  
167 >99.6% similar to *S. salivarius* and *S. vestibularis* (Supplemental Data S1A and link to  
168 current version [http://www.ehombd.org/ftp/HOMD\\_phylogeny/current](http://www.ehombd.org/ftp/HOMD_phylogeny/current)). Each step in this  
169 process improved eHOMD with respect to identification of clones from the SKn dataset,  
170 establishing eHOMD as a resource for the human nasal microbiome (Fig. 1 and Table  
171 S1B).

172 SILVA128 identified the next largest percentage of the SKn clones (91.5%) at species-  
173 level by blastn with our criteria (Table 1). Of the 44,373 clones in the SKn dataset, a  
174 common set of 90.2% were captured at 98.5% identity and 98% coverage by both  
175 databases but with differential species-level assignment for 15.6% (6,237) (Table S2A).  
176 Another 1.3% were identified only with SILVA (Table S2B) and 4.9% were identified  
177 only with eHOMDv15.1 (Table S2C). Of the differentially named SKn clones, 45%  
178 belong to the genus *Corynebacterium*. Therefore, we generated a tree of all of the  
179 references sequences for *Corynebacterium* species from both databases (Supplemental  
180 Data S1B). This revealed that the *C. jeikeium* SILVA-JVVY01000068.479.1974  
181 reference sequence clades with *C. propinquum* references from both databases,  
182 indicating a misannotation in SILVA128. This accounted for 34.4% (2,147) of the



183 differentially named clones, which eHOMD correctly attributed to *C. propinquum* (Table  
184 S2A). Another 207 SKn clones were attracted to *C. fastidiosum* SILVA-  
185 AJ439347.1.1513. eHOMDv15.1 lacks this species, so incorrectly attributed 3.3% (207)  
186 to *C. accolens*. The bulk of the remaining differentially named *Corynebacterium* also  
187 resulted from misannotation of reference sequences in SILVA128, e.g., SILVA-  
188 JWEP01000081.32.1536 as *C. urealyticum*, JVXO01000036.12.1509 as *C.*  
189 *aurimucosum* and SILVA-HZ485462.10.1507 as *C. pseudogenitalium*, which is not a  
190 validly recognized species name (Supplemental Data S1B). Recently, Edgar estimated  
191 an annotation error of ~17% in SILVA128 (33). Since eHOMD taxa are represented by  
192 just one to six highly curated eHOMDrefs, we minimize the misannotation issues  
193 observed in larger databases. At the same time, our deep analysis of the phylogenetic  
194 space of each taxon allows eHOMD to identify a high percentage of reads in  
195 aerodigestive tract datasets. Having compared eHOMDv15.1 and SILVA128, we next  
196 benchmarked the performance of eHOMDv15.1 for assigning taxonomy to both other  
197 16S rRNA gene clone libraries and against short-read 16S rRNA fragment datasets  
198 from the human aerodigestive tract (Table 2).

199 **The 16S rRNA gene V1-V3 region provides superior taxonomic resolution for**  
200 **bacteria from the human aerodigestive tract compared to the V3-V4 region that is**  
201 **commonly used in microbiome studies.** The choice of variable region for NGS-based  
202 short-read 16S rRNA gene microbiome studies impacts what level of phylogenetic  
203 resolution is attainable. For example, for skin, V1-V3 sequencing results show high  
204 concordance with those from metagenomic sequencing (34). Similarly, to enable  
205 species-level distinctions within respiratory tract genera that include both common

206 commensals and pathogens, V1-V3 is preferable for the nasal passages, sinuses and  
207 nasopharynx (2, 35-37). In eHOMDv15.1, we observed that only 14 taxa have 100%  
208 identity across the V1-V3 region, whereas 63 have 100% identity across the V3-V4  
209 region (Table 3). The improved resolution with V1-V3 was even more striking at 99%  
210 identity, with 37 taxa indistinguishable using V1-V3 compared to 269 indistinguishable  
211 using V3-V4. Table S3A-F shows the subsets of taxa collapsing into undifferentiated  
212 groups at each percent identity threshold for the V1-V3 and V3-V4 regions respectively.  
213 This analysis provides clear evidence that V1-V3 sequencing is necessary to achieve  
214 maximal species-level resolution for 16S rRNA gene-based microbiome studies of the  
215 human oral and respiratory tracts, i.e., the aerodigestive tract. Therefore, we used 16S  
216 rRNA gene V1-V2 or V1-V3 short-read datasets to assess the performance of  
217 eHOMDv15.1 in Table 2.

218 **The eHOMD is a resource for taxonomic assignment of 16S rRNA gene**  
219 **sequences from the entire human aerodigestive tract, as well as the lower**  
220 **respiratory tract.** To assess its performance and the value for analysis of datasets  
221 from sites throughout the human aerodigestive tract, eHOMDv15.1 was compared with  
222 three commonly used 16S rRNA gene databases and consistently performed better  
223 than or comparable to these databases (Table 2). For these comparisons, we used  
224 blastn to assign taxonomy to three short-read (V1-V2 and V1-V3) and five  
225 approximately full-length-clone-library 16S rRNA gene datasets from the human  
226 aerodigestive tract that are publicly available (21-23, 25-27, 38-40). For short-read  
227 datasets, we focused on those covering all or part of the V1-V3 region of the 16S rRNA  
228 gene for the reasons discussed above. The chosen datasets include samples from

229 children or adults in health and/or disease. The samples in these datasets are from  
230 human nostril swabs (21, 23), nasal lavage fluid (22), esophageal biopsies (25, 26),  
231 extubated endotracheal tubes (39), endotracheal tube aspirates (38), sputa (40) and  
232 bronchoalveolar lavage (BAL) fluid (27). Endotracheal tube sampling may represent  
233 both upper and lower respiratory tract microbes and sputum may be contaminated by  
234 oral microbes, whereas BAL fluid represents microbes present in the lower respiratory  
235 tract. Therefore, these provide broad representation for bacterial microbiota of the  
236 human aerodigestive tract, as well as the human lower respiratory tract (Table 2). The  
237 composition of the bacterial microbiota from the nasal passages varies across the span  
238 of human life (1) and eHOMD captures this variability. The performance of  
239 eHOMDv15.1 in Table 2 establishes it as a resource for microbiome studies of all body  
240 sites within the human respiratory and upper digestive tracts.

241 The eHOMDv15.1 performed very well for nostril samples (Tables 1 and 2), which are a  
242 type of skin microbiome sample since the nostrils open onto the skin-covered surface of  
243 the nasal vestibules. Based on this, we hypothesized that eHOMD might also perform  
244 well for other skin sites. To test this hypothesis, we used eHOMDv15.04 to perform  
245 blastn for taxonomic assignment of 16S rRNA gene reads from the complete set of  
246 clones from multiple nonnasal skin sites generated by Segre, Kong and colleagues  
247 (SKs dataset) (11-16). As shown in Table 4, eHOMDv15.04 performed very well for oily  
248 skin sites (alar crease, external auditory canal, back, glabella, manubrium, retroauricular  
249 crease and occiput) and the nostrils (nares), identifying >88% of the clones, which was  
250 more than the other databases for six of these eight sites. Either SILVA128 or  
251 eHOMDv15.04 consistently identified the most clones for each skin site to species level

252 (98.5% identity and 98% coverage); eHOMDv15.04 is almost identical to the released  
253 eHOMDv15.1. In contrast, eHOMDv15.04 performed less well than SILVA128 for the  
254 majority of the moist skin sites (Table 4), e.g., the axillary vault (arm pit). A review of the  
255 details of these results revealed that a further expansion comparable to what we did to  
256 go from an oral-focused to an aerodigestive tract-focused database is necessary for  
257 eHOMD to include the full diversity of all skin sites.

258 **The eHOMD is a resource for annotated genomes matched to HMTs for use in**  
259 **metagenomic and metatranscriptomic studies.** Well-curated and annotated  
260 reference genomes correctly named at the species level are a critical resource for  
261 mapping metagenomic and metatranscriptomic data to gene and functional information,  
262 and for identifying species-level activity within the microbiome. There are currently  
263 >160,000 microbial genomic sequences deposited to GenBank; however, many of these  
264 genomes remain poorly or not-yet annotated or lack species-level taxonomy  
265 assignment, thus limiting the functional interpretation of  
266 metagenomic/metatranscriptomic studies to the genus level. Therefore, as an ongoing  
267 process, one goal of the eHOMD is to provide correctly named, curated and annotated  
268 genomes for all HMTs. In generating eHOMDv15.1, we determined the species-level  
269 assignment for 117 genomes in GenBank that were previously identified only to the  
270 genus level and which matched to 25 eHOMD taxa (Supplemental Data S1C and S1D).  
271 For each of these genomes, the phylogenetic relationship to the assigned HMT was  
272 verified by both phylogenetic analysis using 16S rRNA gene sequences (Supplemental  
273 Data S1C) and by phylogenomic analysis using a set of core proteins and PhyloPhlAn

274 (41) (Supplemental Data S1D). To date, 85% (475) of the cultivated taxa (and 62% of all  
275 taxa) included in eHOMD have at least one sequenced genome.

276 **The eHOMD is a resource for species-level assignment to the outputs of high-**  
277 **resolution 16S rRNA gene analysis algorithms.** Algorithms, such as DADA2 and  
278 MED, permit high-resolution parsing of 16S rRNA gene short-read sequences (3, 4).  
279 Moreover, the RDP naïve Bayesian Classifier is an effective tool for assigning taxonomy  
280 to 16S rRNA gene sequences, both full length and short reads, when coupled with a  
281 robust, well-curated training set (42, 43). Together these tools permit species-level  
282 analysis of short-read 16S rRNA gene datasets. Because the V1-V3 region is the most  
283 informative short-read fragment for most of the common bacteria of the aerodigestive  
284 tract, we generated a training set for the V1-V3 region of the 16S rRNA gene that  
285 includes all taxa represented in the eHOMD, which is described elsewhere. In our  
286 training set, we grouped taxa that were indistinguishable based on the sequence of their  
287 V1-V3 region together as supraspecies to preserve subgenus-level resolution, e.g.,  
288 *Staphylococcus capitis\_caprae*.

289 **Advantages and limitations of the eHOMD.** The eHOMD has advantages and  
290 limitations when compared to other 16S rRNA gene databases, such as RDP, NCBI,  
291 SILVA and Greengenes (28-32). Its primary distinction is that eHOMD is dedicated to  
292 providing taxonomic, genomic, bibliographic and other information specifically for the  
293 approximately 800 microbial taxa found in the human aerodigestive tract (summarized  
294 in Table 5). Here, we highlight five advantages of eHOMD. First, the eHOMD is based  
295 on extensively curated 16S rRNA reference sets (eHOMDrefs) and a taxonomy that  
296 uses phylogenetic position in 16S rRNA-based trees rather than a taxon's currently

297 assigned, or misassigned, taxonomic name (6). For example, the genus “*Eubacteria*” in  
298 the phylum Firmicutes includes members that should be divided into multiple genera in  
299 seven different families (44). In eHOMD, members of the “*Eubacteria*” are placed in  
300 their phylogenetically appropriate family, e.g., *Peptostreptococcaceae*, rather than  
301 incorrectly into the family *Eubacteriaceae*. Appropriate taxonomy files are readily  
302 available from eHOMD for mothur (45) and other programs. Second, because eHOMD  
303 includes a provisional species-level naming scheme, sequences that can only be  
304 assigned genus-level taxonomy in other databases are resolved to species level via an  
305 HMT number. This enhances the ability to identify and learn about taxa that currently  
306 lack full identification and naming. Importantly, the HMT number is stable, i.e., it stays  
307 constant even as a taxon is named or the name is changed. This facilitates tracking  
308 knowledge of a specific taxon over time and between different studies. Third, in  
309 eHOMD, for the 475 taxa with at least one sequenced genome, genomes can be  
310 viewed graphically in the dynamic JBrowse genome web viewer (46) or searched using  
311 blastn, blastp, blastx, tblastn or tblastx. For taxa lacking accessible genomic sequences  
312 the available 16S rRNA sequences are included. Many genomes of aerodigestive tract  
313 organisms are in the whole-genome shotgun contigs (wgs) section of NCBI and are  
314 visible by blast search only through wgs provided that one knows the genome and can  
315 provide the BioProjectID or WGS Project ID. At eHOMD, one can readily compare  
316 dozens to over a hundred genomes for some taxa to begin to understand the  
317 pangenome of aerodigestive tract microbes. Fourth, we have also compiled proteome  
318 sequence sets for genome-sequenced taxa enabling proteomics and mass spectra  
319 searches on a dataset limited to proteins from ~2,000 relevant genomes. Fifth, for

320 analysis of aerodigestive track 16S rRNA gene datasets, eHOMD is a focused collection  
321 and, therefore, smaller in size. This results in increased computational efficiency  
322 compared to the other databases. eHOMD performed a blastn of ten 16S rRNA gene  
323 full length reads in 0.277 seconds, while the same analysis with the NCBI 16 database  
324 took 3.647 seconds and RDP and SILVA needed more than 1 minute (see  
325 Supplementary Methods).

326 In terms of limitations, the taxa included in the eHOMD, the 16S rRNA reference  
327 sequences and genomes are not appropriate for samples from 1) human body sites  
328 outside of the aerodigestive and respiratory tracts, 2) nonhuman hosts or 3) the  
329 environment. In contrast, RDP (29), SILVA (30, 31) and Greengenes (32) are curated  
330 16S rRNA databases inclusive of all sources and environments. Whereas, the NCBI  
331 16S database is a curated set of sequences for bacterial and archaeal named species  
332 only (aka RefSeqs) that is frequently updated (28). Finally, the NCBI nucleotide  
333 database (nr/nt) includes the largest set of 16S rRNA sequences available; however,  
334 the vast majority have no taxonomic attribution and are listed as simply “uncultured  
335 bacterium clone.” Thus, RDP, SILVA, NCBI, Greengenes and other similar general  
336 databases have advantages for research on microbial communities outside the human  
337 respiratory and upper digestive tracts, whereas eHOMD is preferred for the  
338 microbiomes of the human upper digestive and respiratory tracts.

## 339 **II. The eHOMD revealed previously unknown properties of the human nasal** 340 **microbiome.**

341 To date the human nasal microbiome has mostly been characterized at the genus level.  
342 For example, the Human Microbiome Project (HMP) characterized the bacterial

343 community in the adult nostrils (nares) to the genus level using 16S rRNA sequences  
344 (23, 24). However, the human nasal passages can host a number of genera that include  
345 both common commensals and important bacterial pathogens, e.g., *Staphylococcus*,  
346 *Streptococcus*, *Haemophilus*, *Moraxella* and *Neisseria* (reviewed in (1)). Thus, species-  
347 level nasal microbiome studies are needed from both a clinical and ecological  
348 perspective. Therefore, to further our understanding of the adult nostril microbiome, we  
349 used MED (3), the RDP classifier (42) and our eHOMD V1-V3 training set to reanalyze  
350 a subset of the HMP nares V1-V3 16S rRNA dataset consisting of one sample each  
351 from 210 adults (see Methods). Henceforth, we refer to this subset as the HMP nares  
352 V1-V3 dataset. This resulted in species/supraspecies-level taxonomic assignment for  
353 95% of the sequences and revealed new insights into the adult nostril microbiome,  
354 which are described below.

355 **A small number of cultivated species account for the majority of the adult nostril**  
356 **microbiome.** Genus-level information from the HMP corroborates data from smaller  
357 cohorts showing the nostril microbiome has a very uneven distribution both overall and  
358 per person, reviewed in (47). In our reanalysis, 10 genera accounted for 95% of the total  
359 reads from 210 adults (see Methods), with the remaining genera each present at very  
360 low relative abundance and prevalence (Fig. 2A and Table S4A). Moreover, for the  
361 majority of participants, 5 or fewer genera constituted 90% of the sequences in their  
362 sample (Fig. 2B). This uneven distribution characterized by the numeric dominance of a  
363 small number of taxa was even more striking at the species level (48). We found that  
364 the 6 most relatively abundant species made up 72% of the total sequences, and the  
365 top 5 each had a prevalence of  $\geq 81\%$  (Fig. 2C and Table S4B). Moreover, between 2



366 and 10 species accounted for 90% of the sequences in 94% of the participants (Fig.  
367 2D). Also, just 19 species/supraspecies-level taxa constituted 90% of the total 16S  
368 rRNA gene sequences from all 210 participants (Table S4B), and one of these belonged  
369 to an as-yet-uncultivated genus, as described below. The implication of these findings is  
370 that *in vitro* consortia consisting of small numbers of species can effectively represent  
371 the natural nasal community, facilitating functional studies of the nostril microbiome.

372 **Identification of two previously unrecognized common nasal bacterial taxa.**

373 Reanalysis of both the HMP nares V1-V3 dataset and the SKn 16S rRNA gene clone  
374 dataset revealed two previously unrecognized taxa are common in the nostril  
375 microbiome: *Lawsonella clevelandensis* and an unnamed *Neisseriaceae* [G-1]  
376 bacterium, to which we assigned the provisional name *Neisseriaceae* [G-1] bacterium  
377 HMT-174. These are discussed in further detail below.

378 **The human nasal passages are the primary habitat for a subset of bacterial**

379 **species.** The topologically external surfaces of the human body are the primary habitat  
380 for a number of bacterial taxa, which are often present at both high relative abundance  
381 and high prevalence in the human microbiome. In generating the eHOMDv15.1, we  
382 hypothesized that comparing the relative abundance of sequences identified to species  
383 or supraspecies level in the SKn clones and the SKs clones (nonnasal skin sites) would  
384 permit putative identification of the primary body-site habitat for a subset of nostril-  
385 associated bacteria. Based on criteria described in the methods, we putatively identified  
386 13 species as having the nostrils and 1 species as having skin as their primary habitat  
387 (Table S5). Online at <http://ehomd.org/index.php?name=HOMD> the primary body site  
388 for each taxon is denoted as oral, nasal, skin, vaginal or unassigned. Definitive

389 identification of the primary habitat of all human-associated bacteria will require species-  
390 level identification of bacteria at each distinct habitat across the surfaces of the human  
391 body from a cohort of individuals. This would enable a more complete version of the  
392 type of comparison performed here.

393 Members of the genus *Corynebacterium* (phylum Actinobacteria) are common in human  
394 nasal, skin and oral microbiomes but their species-level distribution across these body  
395 sites remains less clear (23). Our analysis of the SKns clones identified three  
396 *Corynebacterium* as primarily located in the nostrils compared to the other skin sites: *C.*  
397 *propinquum*, *C. pseudodiphtheriticum* and *C. accolens* (Table S5). In the species-level  
398 reanalysis of the HMP nares V1-V3 dataset, these were among the top five  
399 *Corynebacterium* species/supraspecies by rank order abundance of sequences (Table  
400 S4B). In this reanalysis, *Corynebacterium tuberculostearicum* accounted for the fourth  
401 largest number of sequences; however, in the SKns clones it was not disproportionately  
402 present in the nostrils. Therefore, although common in the nostrils, we did not consider  
403 the nostrils the primary habitat for *C. tuberculostearicum*, in contrast to *C. propinquum*,  
404 *C. pseudodiphtheriticum* and *C. accolens*.

405 **The human skin and nostrils are primary habitats for *Lawsonella clevelandensis*.**

406 In 2016, *Lawsonella clevelandensis* was described as a novel genus and species within  
407 the suborder *Corynebacterineae* (phylum *Actinobacteria*) (49); genomes for two isolates  
408 are available (50). It was initially isolated from several human abscesses, mostly from  
409 immunocompromised hosts, but its natural habitat was unknown. This led to speculation  
410 *L. clevelandensis* might either be a member of the human microbiome or an  
411 environmental microbe with the capacity for opportunistic infection (49, 51). Our results

412 indicate that *L. clevelandensis* is a common member of the bacterial microbiome of  
413 some oily skin sites and the nostrils of humans (Table S5). Indeed, in the SKn clones,  
414 we detected *L. clevelandensis* as the 11<sup>th</sup> most abundant taxon. Validating the SKn data  
415 in our reanalysis of the HMP nares V1-V3 dataset from 210 participants, we found that  
416 *L. clevelandensis* was the 5th most abundant species overall with a prevalence of 86%  
417 (Table S4B). In the nostrils of individual HMP participants, *L. clevelandensis* had an  
418 average relative abundance of 5.7% and a median relative abundance of 2.6% (range 0  
419 to 42.9%). *L. clevelandensis* is recently reported to be present on skin (52). Our  
420 reanalysis of the SKns clones indicated that of these body sites the primary habitat for  
421 *L. clevelandensis* is oily skin sites, in particular the alar crease, glabella and occiput  
422 where it accounts for higher relative abundance than in the nostrils (Table S5). Virtually  
423 nothing is known about the role of *L. clevelandensis* in the human microbiome. By  
424 report, it grows best under anaerobic conditions (<1% O<sub>2</sub>) and cells are a mixture of  
425 pleomorphic cocci and bacilli that stain gram-variable to gram-positive and partially acid  
426 fast (49, 50). Based on its 16S rRNA gene sequence, *L. clevelandensis* is most closely  
427 related to the genus *Dietzia*, which includes mostly environmental species. Within its  
428 suborder *Corynebacterineae* are other human associated genera, including  
429 *Corynebacterium*, which is commonly found on oral, nasal and skin surfaces, and  
430 *Mycobacterium*. Our analyses demonstrate *L. clevelandensis* is a common member of  
431 the human skin and nasal microbiomes, opening up opportunities for future research on  
432 its ecology and its functions with respect to humans.

433 **The majority of the bacteria detected in our reanalysis of the human nasal**  
434 **passages are cultivated.** Using blastn to compare the 16S rRNA gene SKn clones

435 with eHOMDv15.1, we found that 93.1% of these sequences from adult nostrils can be  
436 assigned to cultivated named species, 2.1% to cultivated unnamed taxa, and 4.7% to  
437 uncultivated unnamed taxa. In terms of the total number of species-level taxa  
438 represented by the SKn clones, rather than the total number of sequences, 70.1%  
439 matched to cultivated named taxa, 14.4% to cultivated unnamed taxa, and 15.5%  
440 uncultivated unnamed taxa. Similarly, in the HMP nares V1-V3 dataset from 210  
441 participants (see below), 91.1% of sequences represented cultivated named bacterial  
442 species. Thus, the bacterial microbiota of the nasal passages is numerically dominated  
443 by cultivated bacteria. In contrast, approximately 30% of the oral microbiota  
444 ([ehomd.org](http://ehomd.org)) and a larger, but not precisely defined, fraction of the intestinal microbiota  
445 is currently uncultivated (53, 54). The ability to cultivate the majority of species detected  
446 in the nasal microbiota is an advantage when studying the functions of members of the  
447 nasal microbiome.

448 **One common nasal taxon remains to be cultivated.** In exploring the SKn dataset to  
449 generate eHOMD, we realized that the 12th most abundant clone in the SKn dataset  
450 lacked genus-level assignment. To ensure this was not just a common chimera, we  
451 broke the sequence up into thirds and fifths and subjected each fragment to blastn  
452 against eHOMD and GenBank. The fragments hit only our reference sequences and  
453 were distant to other sequences across the entire length. Therefore, this clone  
454 represents an unnamed and apparently uncultivated *Neisseriaceae* bacterial taxon to  
455 which we have assigned the provisional name *Neisseriaceae* [G-1] bacterium HMT-174  
456 ([G-1] to designate unnamed genus 1). Its provisional naming facilitates recognition of  
457 this bacterium in other datasets and its future study. In our reanalysis of the HMP nares

458 V1-V3 dataset, *Neisseriaceae* [G-1] bacterium HMT-174 was the 10th most abundant  
459 species overall with a prevalence of 35%. In individual participants, it had an average  
460 relative abundance of 1.3% and a median relative abundance of 0 (range 0 to 38.4%).  
461 Blastn analysis of our reference sequence for *Neisseriaceae* [G-1] bacterium HMT-174  
462 against the 16S ribosomal RNA sequences database at NCBI gave matches of 90% to  
463 92% similarity to members of the family *Neisseriaceae* and matches to the neighboring  
464 family *Chromobacteriaceae* at 88% to 89%. A phylogenetic tree of taxon HMT-174 with  
465 members of these two families was more instructive since it clearly placed taxon HMT-  
466 174 as a deeply branching, but monophyletic, member of the *Neisseriaceae* family with  
467 the closest named taxa being *Snodgrassella alvi* (NR\_118404) at 92% similarity and  
468 *Vitreoscilla stercoraria* (NR\_0258994) at 91% similarity, and the main cluster of  
469 *Neisseriaceae* at or below 92% similar (Supplemental Data S1E). The main cluster of  
470 genera in a tree of the family *Neisseriaceae* includes *Neisseria*, *Alysiella*, *Bergeriella*,  
471 *Conchiformibius*, *Eikenella*, *Kingella* and other mammalian host-associated taxa. There  
472 is a separate clade of the insect associated genera *Snodgrassella* and *Stenoxybacter*,  
473 whereas *Vitreoscilla* is from cow dung and forms its own clade. Recognition of the as-  
474 yet-uncultivated *Neisseriaceae* [G-1] bacterium HMT-174 as a common member of the  
475 adult nostril microbiome supports future research to cultivate and characterize this  
476 bacterium. *Neisseriaceae* [G-1] bacterium HMT-327 is another uncultivated nasal taxon,  
477 likely from the same unnamed genus, and the 20th (HMP) and 46<sup>th</sup> (SKn) most common  
478 nasal organism in the two datasets we reanalyzed. There are several additional  
479 uncultured nasal bacteria in eHOMD, highlighting the need for sophisticated cultivation  
480 studies even in the era of NGS studies. Having 16S rRNA reference sequences tied to

481 the provisional taxonomic scheme in eHOMD allows targeted efforts to culture the  
482 previously uncultivated based on precise 16S rRNA identification methods.

483 **No species are differentially abundant with respect to either *Neisseriaceae* [G-1]**  
484 **bacterium HMT-174 or *L. clevelandensis*.** There is a lack of knowledge about  
485 potential relationships between the two newly recognized members of the nostril  
486 microbiome, *L. clevelandensis* and *Neisseriaceae* [G-1] bacterium HMT-174, and other  
487 known members of the nostril microbiome. Therefore, we performed Analysis of  
488 Composition of Microbiomes, aka ANCOM (55), on samples grouped based on the  
489 presence or absence of sequences of each of these two taxa of interest in search of  
490 species displaying differential relative abundance based on either one. For  
491 *Neisseriaceae* [G-1] bacterium HMT-174, this was targeted at identifying potential  
492 growth partners for this as-yet-uncultivated bacterium. However, ANCOM detected only  
493 the group-specific taxon in each case and did not reveal any other species with  
494 differential relative abundance with respect to either *Neisseriaceae* [G-1] bacterium  
495 HMT-174 (Fig. 3A) or *L. clevelandensis* (Fig. 3B).

496 **Several common species of nasal bacteria are more abundant when *S. aureus* is**  
497 **absent.** Finally, as proof of principle that eHOMD enhances the clinical relevance of  
498 16S rRNA gene-based microbiome studies, we turned our attention to *S. aureus*, which  
499 is both a common member of the nasal microbiome and an important human pathogen,  
500 with >10,000 attributable deaths/year in the U.S. (56-58). The genus *Staphylococcus*  
501 includes many human commensals hence the clinical importance of distinguishing  
502 *aureus* from non-*aureus* species. In our reanalysis of the HMP nares V1-V3 dataset, *S.*  
503 *aureus* sequences accounted for 3.9% of the total sequences with a prevalence of 34%

504 (72 of the 210 participants), consistent with it being common in the nasal microbiome (2,  
505 59). *S. aureus* nostril colonization is a risk factor for invasive infection at distant body  
506 sites (56, 60). Therefore, in the absence of an effective vaccine (61, 62), there is  
507 increasing interest in identifying members of the nostril and skin microbiome that might  
508 play a role in colonization resistance to *S. aureus*, e.g., (63-66). Although differential  
509 relative abundance does not indicate causation, identifying such relationships at the  
510 species level in a cohort the size of the HMP can arbitrate variations among findings in  
511 smaller cohorts and generate new hypotheses for future testing. Therefore, we used  
512 ANCOM to identify taxa displaying differential relative abundance in HMP nostril  
513 samples in which 16S rRNA gene sequences corresponding to *S. aureus* were absent  
514 or present (55). In this HMP cohort of 210 adults, two *Corynebacterium*  
515 species/supraspecies—*accolens* and *accolens\_macginleyi\_tuberculostearicum*—  
516 showed positive differential abundance in the absence of *S. aureus* nostril colonization  
517 (Fig. 3C, panels i and ii ). These two were among the nine most abundant species in the  
518 cohort overall (Fig. 2C and Table S4B). As previously reviewed (47), there is variability  
519 between studies with smaller cohorts with respect to the reported correlations between  
520 *S. aureus* and specific *Corynebacterium* species in the nostril microbiome; this  
521 variability might relate to strain-level differences and/or to the small cohort sizes. *D.*  
522 *pigrum* (67) also showed a positive differential abundance in the absence of *S. aureus*  
523 (Fig. 3C, panel iii). This is consistent with observations from Liu, Andersen and  
524 colleagues that high-levels of *D. pigrum* are the strongest predictor of absence of *S.*  
525 *aureus* nostril colonization in 89 older adult Danish twin pairs (68). In our reanalysis of  
526 the HMP nares V1-V3 dataset, *D. pigrum* was the 6th most abundant species overall

527 with a prevalence of 41% (Fig. 2C and Table S4B). There were no species, other than  
528 the group-specific taxon *S. aureus*, with positive differential abundance when *S. aureus*  
529 was present (Fig. 3C, panel iv).

530 **Summary.** As demonstrated here, the eHOMD ([ehomd.org](http://ehomd.org)) is a comprehensive well-  
531 curated online database for the bacterial microbiome of the entire aerodigestive tract  
532 enabling species/supraspecies-level taxonomic assignment to full-length and V1-V3  
533 16S rRNA gene sequences and including correctly assigned, annotated available  
534 genomes. In generating the eHOMD, we identified two previously unrecognized  
535 common members of the adult human nostril microbiome, opening up new avenues for  
536 future research. As illustrated using the adult nostril microbiome, eHOMD can be  
537 leveraged for species-level analyses of the relationship between members of the  
538 aerodigestive tract microbiome, enhancing the clinical relevance of studies and  
539 generating new hypotheses about interspecies interactions and the functions of  
540 microbes within the human microbiome. The eHOMD provides a broad range of  
541 microbial researchers, from basic to clinical, a resource for exploring the microbial  
542 communities that inhabit the human respiratory and upper digestive tracts in health and  
543 disease.

544

## 545 **MATERIALS AND METHODS**

546 **Generating the provisional eHOMDv15.01 by adding bacterial species from**  
547 **culture-dependent studies.** To identify candidate Human Microbial Taxa (cHMTs), we  
548 reviewed two studies that included cultivation of swabs taken from along the nasal  
549 passages in both health and chronic rhinosinusitis (CRS) (18, 19) and one study of



550 mucosal swabs and nasal washes only in health (17). We also reviewed a culture-  
551 dependent study of anaerobic bacteria isolated from cystic fibrosis (CF) sputa to identify  
552 anaerobes that might be present in the nasal passages/sinuses in CF (20). Using this  
553 approach, we identified 162 cHMTs, of which 65 were present in HOMDv14.51 and 97  
554 were not (Fig. 1A and Table S1A). For each of these 97 named species, we  
555 downloaded at least one 16S rRNA gene RefSeq from NCBI 16S (via a search of  
556 BioProjects 33175 and 33317) (28) and assembled these into a reference database for  
557 blast. We then queried this via blastn with the SKn dataset to determine which of the 97  
558 cHMTs were either residents or very common transients of the nasal passages (Fig.  
559 1A). We identified 30 cHMTs that were represented by  $\geq 10$  sequences in the SKn  
560 dataset with a match at  $\geq 98.5\%$  identity. We added these 30 candidate taxa,  
561 represented by 31 16S rRNA gene reference sequences for eHOMD (eHOMDrefs), as  
562 permanent HMTs to the HOMDv14.51 alignment to generate the eHOMDv15.01 (Fig.  
563 1A and Table S6A). Of note, with the addition of nonoral taxa, we have replaced the old  
564 provisional taxonomy prefix of Human Oral Taxon (HOT) with Human Microbial Taxon  
565 (HMT), which is applied to all taxa in the eHOMD.

566 **Generating the provisional eHOMDv15.02 by identifying additional HMTs from a**  
567 **dataset of 16S rRNA gene clones from human nostrils.** For the second step on the  
568 HOMD expansion, we focused on obtaining new eHOMDrefs from the SKn dataset (i.e.,  
569 the 44,374 16S rRNA gene clones from nostril (anterior nares) samples generated by  
570 Julie Segre, Heidi Kong and colleagues (11-16)). We used blastn to query the SKn  
571 clones versus the provisional database eHOMDv15.01. Of the nostril-derived 16S rRNA  
572 gene clones, 37,716 of 44,374 matched reference sequences in eHOMDv15.01 at

573  $\geq 98.5\%$  identity (Fig. 1B) and 6163 matched to eHOMDv15.01 at  $< 98\%$  (Fig. 1C). The  
574 SKn clones that matched eHOMDv15.01 at  $\geq 98.5\%$  could be considered already  
575 identified by eHOMDv15.01. Nevertheless, these already identified clones were used as  
576 query to perform blastn versus the NCBI 16S database (28) to identify other NCBI  
577 RefSeqs that might match these clones with a better identity. We compared the blastn  
578 results against eHOMDv15.01 and NCBI 16S and if the match was substantially better  
579 to a high-quality sequence (close to full length and without unresolved nucleotides) from  
580 the NCBI 16S database then that one was considered for addition to the database.  
581 Using this approach, we identified two new HMTs (represented by one eHOMDref each)  
582 and five new eHOMDrefs for taxa present in eHOMDv14.51 that improved capture of  
583 sequences to these taxa (Fig. 1B and Table S6A). For the 6163 SKn clones that  
584 matched to eHOMDv15.01 at  $< 98\%$ , we performed clustering at  $\geq 98.5\%$  identity across  
585 99% coverage and inferred an approximately maximum-likelihood phylogenetic tree  
586 (Fig. 1C and Supplemental Methods). If a cluster (an M-OTU) had  $\geq 10$  clone sequences  
587 (30 out of 32), then we chose representative sequence(s) from that cluster based on a  
588 visual assessment of the cluster alignment. Each representative sequence was then  
589 queried against the NCBI nr/nt database to identify either the best high-quality, named  
590 species-level match or, lacking this, the longest high-quality clone sequence to use as  
591 the eHOMDref. Clones lacking a named match were assigned a genus name based on  
592 their position in the tree and an HMT number, which serves as a provisional name. The  
593 cluster representative sequence(s) plus any potentially superior reference sequences  
594 from the NCBI nr/nt database were finally added to the eHOMDv15.01 alignment to  
595 create the eHOMDv15.02. Using this approach, we identified and added 28 new HMTs,

596 represented in total by 38 eHOMDrefs (Fig. 1C and Table S6A). Of note, we set aside  
597 the 1.1% (495 of 44,374) of SKn clones that matched at between 98 and 98.5% identity,  
598 to avoid calling a taxon where no new taxon existed in the tree-based analysis of  
599 sequences that matched at <98%.

600 **Generating the provisional eHOMDv15.03 by identifying additional candidate taxa**  
601 **from culture-independent studies of aerodigestive tract microbiomes.** To further  
602 improve the performance of the evolving eHOMD, we took all of the SKn dataset clones  
603 that matched eHOMDv15.02 at <98.5% identity, clustered these at  $\geq 98.5\%$  identity  
604 across a coverage of 99% and inferred an approximately maximum-likelihood  
605 phylogenetic tree (Supplemental Methods). Subsequent evaluation of this tree (see  
606 previous section) identified two more HMTs (represented in total by 3 eHOMDrefs) and  
607 one new eHOMDref for a taxon already in the database for addition to eHOMDv15.03  
608 (Fig. 1D and Table S6A). To identify additional taxa that are resident to sites in the  
609 aerodigestive tract beyond the mouth and that are not represented by enough clones in  
610 the SKn dataset to meet our criteria, we iteratively evaluated the performance of  
611 eHOMDv15.02 with 5 other 16S rRNA gene datasets from aerodigestive tract sites  
612 outside the mouth (Fig. 1E). We used the following criteria to select these datasets to  
613 assay for the performance of eHOMDv15.02 as a reference database for the  
614 aerodigestive tract across the span of human life in health and disease: (1) all  
615 sequences covered at least variable regions 1 and 2 (V1-V2), because for many  
616 bacteria resident in the aerodigestive tract V1-V2/V1-V3 includes sufficient sequence  
617 variability to get towards species-level assignment (Table 3); and (2) the raw sequence  
618 data was either publicly available or readily supplied by the authors upon request. This

619 approach yielded a representative set of datasets (Table S1C) (21-23, 25-27).  
620 Additional information on how we obtained and prepared each dataset for use is in  
621 Supplemental Methods. For each dataset from Table S1C, we separately performed a  
622 blastn against eHOMDv15.02 and filtered the results to identify the percent of reads  
623 matching at  $\geq 98.5\%$  identity (Fig. 1E). To compare the performance of eHOMDv15.02  
624 with other commonly used 16S rRNA gene databases, we also performed a blastn  
625 against NCBI 16S (28), RDP16 (29) and SILVA128 (30, 31) databases using the same  
626 filter as with eHOMDv15.02 for each dataset (Table S1C). If one of these other  
627 databases captured more sequences than eHOMDv15.02 at  $\geq 98.5\%$  identity, we then  
628 identified the reference sequence in the outperforming database that was capturing  
629 those sequences and evaluated it for inclusion in eHOMD. Based on this comparative  
630 approach, we added three new HMTs (represented by one eHOMDref each) plus five  
631 new eHOMDrefs for taxa already present in eHOMDv15.02 to the provisional database  
632 to create eHOMDv15.03 (Fig. 1E and Table S6A).

633 **Generating the provisional eHOMDv15.04 by identifying additional candidate taxa**  
634 **from a dataset of 16S rRNA gene clones from human skin.** Having established that  
635 eHOMDv15.03 serves as an excellent 16S rRNA gene database for the aerodigestive  
636 tract microbiome in health and disease, we were curious as to how it would perform  
637 when evaluating 16S rRNA gene clone libraries from skin sites other than the nostrils.  
638 As reviewed in (47), in humans, the area just inside the nostrils, which are the openings  
639 into the nasal passages, is the skin-covered-surface of the nasal vestibule. Prior studies  
640 have demonstrated that the bacterial microbiota of the skin of the nasal vestibule (aka  
641 nostrils or nares) is distinctive and most similar to other moist skin sites (11). To test

642 how well eHOMDv15.03 performed as a database for skin microbiota in general, we  
643 executed a blastn using 16S rRNA gene clones from all of the nonnasal skin sites  
644 included in the Segre-Kong dataset (SKs) to assess the percentage of total sequences  
645 captured at  $\geq 98.5\%$  identity over  $\geq 98\%$  coverage. Only 81.7% of the SKs clones were  
646 identified with eHOMDv15.03, whereas 95% of the SKn clones were identified (Table  
647 S1B). We took the unidentified SKs sequences and did blastn versus the SILVA128  
648 database with the same filtering criteria. To generate eHOMDv15.04, we first added the  
649 top 10 species from the SKs dataset that did not match to eHOMDv15.03, all of which  
650 had  $>350$  reads in SKs (Fig. 1F and Table S6A). Of note, for two of the skin-covered  
651 body sites a single taxon accounted for the majority of reads that were unassigned with  
652 eHOMDv15.03: *Staphylococcus auricularis* from the external auditory canal and  
653 *Corynebacterium massiliense* from the umbilicus. Addition of these two considerably  
654 improved the performance of eHOMD for their respective body site. Next, we revisited  
655 the original list of 97 cHMTs and identified 4 species that are present in  $\geq 3$  of the 34  
656 subjects in Kaspar et al. (19) (Table S1A column E), that had  $\geq 30$  reads in the SKs  
657 dataset and that matched to SILVA128 but not to eHOMDv15.03. These we added to  
658 generate eHOMDv15.04 (Fig. 1G and Table S6A).

659 **Establishing eHOMD reference sequences and final updates to generate**  
660 **eHOMDv15.1.** Each eHOMD reference sequence (eHOMDref) is a manually corrected  
661 representative sequence with a unique alphanumeric identifier that starts with its three-  
662 digit HMT #; each is associated with the original NCBI accession # of the candidate  
663 sequence. For each candidate 16S rRNA gene reference sequence selected, a blastn  
664 was performed against the NCBI nr/nt database and filtered for matches at  $\geq 98.5\%$

665 identity to identify additional sequences for comparison in an alignment, which was used  
666 to either manually correct the original candidate sequence or select a superior  
667 candidate from within the alignment. Manual correction included correction of all  
668 ambiguous nucleotides, any likely sequencing miscalls/errors and addition of consensus  
669 sequence at the 5'/3' ends to achieve uniform length. All ambiguous nucleotides from  
670 earlier versions were corrected in the transition from HOMDv15.04 to eHOMDv15.1  
671 because ambiguous bases, such as "R" and "Y", are always counted as mismatches  
672 against a nonambiguous base. Also, in preparing v15.1, nomenclature for  
673 *Streptococcus* species was updated in accordance with (69) and genus names were  
674 updated for species that were formerly part of the *Propionibacterium* genus in  
675 accordance with (70). *Cutibacterium* is the new genus name for the formerly cutaneous  
676 *Propionibacterium* species (70). In addition to the 79 taxa added in the expansion from  
677 HOMDv14.51 to eHOMDv15.04 (Table S6A), 4 oral taxa were added to the final  
678 eHOMDv15.1: *Fusobacterium hwasookii* HMT-953, *Saccharibacteria* (TM7) bacterium  
679 HMT-954, *Saccharibacteria* (TM7) bacterium HMT-955 and *Neisseria cinerea* HMT-956.  
680 Also, *Neisseria pharyngis* HMT-729 was deleted because it is not validly named and is  
681 part of the *N. sica*–*N. mucosa*–*N. flava* complex.

682 **Identification of taxa with a preference for the human nasal habitat.** We assigned  
683 13 taxa as having the nostrils as their preferred body site habitat. To achieve this, we  
684 first performed the following steps as illustrated in Table S5. 1) We performed blastn of  
685 SKn and SKs versus eHOMDv15.04 and used the first hit based on e-value to assign  
686 putative taxonomy to each clone ; 2) used these names to generate a count table of  
687 taxa and body sites; 3) normalized the total number of clones per body site to 20,000

688 each for comparisons (columns B to V); 4) for each taxon, used the total number of  
689 clones across all body sites as the denominator (column W) to calculate the % of that  
690 clone present at each specific body site (columns Z to AT); 5) calculated the ratio of the  
691 % of each taxon in the nostrils to the expected % if that taxon was evenly distributed  
692 across all 21 body sites in the SKns clone dataset (column Y); and 6) sorted all taxa in  
693 Table S5 by the rank abundance among the nostril clones (column X). Finally, of these  
694 top 20, we assigned nasal as the preferred body site to those that were elevated  $\geq 2x$  in  
695 the nostrils versus what would be expected if evenly distributed across all the skin sites  
696 (column Y). This conservative approach established a lower bound for the eHOMD taxa  
697 that have the nasal passages as their preferred habitat. The SKn dataset includes  
698 samples from children and adults in health and disease (11-16). In contrast, the HMP  
699 nares V1-V3 data are from adults 18 to 40 years of age in health only (23, 24). Of the  
700 species classified as nasal in eHOMDv15.01, 8 of the 13 are in the top 19 most  
701 abundant species from the 210-person HMP nares V1-V3 dataset.

702 **Reanalysis of the HMP nares V1-V3 dataset to species level.** We aligned the  
703 2,338,563 chimera-cleaned reads present in the HMPnV1-V3 (see Suppl. Methods) in  
704 QIIME 1 (align\_seqs.py with default method; PyNAST) (71, 72), using eHOMDv15.04 as  
705 reference database and trimmed for MED using “o-trim-uninformative-columns-from-  
706 alignment” and “o-smart-trim” scripts (3). 2,203,471 reads (94.2% of starting) were  
707 recovered after the alignment and trimming steps. After these initial cleaning steps,  
708 samples were selected such that only those with more than 1000 reads were retained  
709 and each subject was represented by only one sample. For subjects with more than one  
710 sample in the total HMP nares V1-V3 data, we selected for use the one with more reads

711 after the cleaning steps to avoid bias. Thus, what we refer to as the HMP nares V1-V3  
712 dataset included 1,627,514 high quality sequences representing 210 subjects. We  
713 analyzed this dataset using MED with minimum substantive abundance of an oligotype  
714 (-M) equal to 4 and maximum variation allowed in each node (-V) equal to 12 nt, which  
715 equals 2.5% of the 820-nucleotide length of the trimmed alignment. Of the 1,627,514  
716 sequences, 89.9% (1,462,437) passed the -M and -V filtering and are represented in the  
717 MED output. Oligotypes were assigned taxonomy in R with the  
718 `dada2::assignTaxonomy()` function (an implementation of the RDP naive Bayesian  
719 classifier algorithm with a kmer size of 8 and a bootstrap of 100) (4, 42) using the  
720 eHOMDv15.1 V1-V3 Training Set (version 1). We then collapsed oligotypes within the  
721 same species/supraspecies yielding the data shown in Table S7. The count data in  
722 Table S7 was converted to relative abundance by sample at the species/supraspecies  
723 level to generate an input table for ANCOM including all identified taxa (i.e., we did not  
724 remove taxa with low relative abundance). ANCOM (version 1.1.3) was performed using  
725 presence or absence of *Neisseriaceae* [G-1] bacterium HMT-174, *L. clevelandensis* or  
726 *S. aureus* as group definers. ANCOM default parameters were used (sig = 0.05, tau =  
727 0.02, theta = 0.1, repeated = FALSE) except that we performed a correction for multiple  
728 comparisons (multcorr = 2) instead of using the default no correction (multcorr = 3) (55).

729 **Recruitment of genomes matching HMTs to eHOMD and assignment of species-**  
730 **level names to genomes previously named only at then genus level.** Genomic  
731 sequences were downloaded from the NCBI FTP site  
732 (<ftp://ftp.ncbi.nlm.nih.gov/genomes>). Genome information, e.g., genus, species and  
733 strain name were obtained from a summary file listed on the FTP site in July 2018:



734 [ftp://ftp.ncbi.nlm.nih.gov/genomes/ASSEMBLY\\_REPORTS/assembly\\_summary\\_genba](ftp://ftp.ncbi.nlm.nih.gov/genomes/ASSEMBLY_REPORTS/assembly_summary_genba)  
735 [nk.txt](#). To recruit genomes for provisionally named eHOMD taxa (HMTs), genomic  
736 sequences from the same genus were targeted. For 6 genera present in eHOMD, we  
737 downloaded and analyzed 130 genomic sequences from GenBank that were  
738 taxonomically assigned only to the genus level (i.e., with “sp.” in the species annotation)  
739 because some of these might belong to a HMT. To determine the closest HMT for each  
740 of these genomes, the 16S rRNA genes were extracted from each genome and were  
741 blastn-searched against the eHOMDv15.1 reference sequences. Of the 130 genomes  
742 tested, we excluded 13 that had <98% sequence identity to any of the eHOMDrefs. The  
743 remaining 117 genomes fell within a total of 25 eHOMD taxa at a percent identity  
744  $\geq 98.5\%$  to one of the eHOMDrefs (Table S6B). To validate the phylogenetic relatedness  
745 of these genomes to HMTs, the extracted 16S rRNA gene sequences were then aligned  
746 with the eHOMDrefs using the MAFFT software (V7.407) (73) and a phylogenetic tree  
747 was generated using FastTree (Version 2.1.10.Dbl) (74) with the default Jukes-Cantor +  
748 CAT model for tree inference (Supplemental Data S1C). The relationship of these  
749 genomes to eHOMD taxa was further confirmed by performing phylogenomic analysis in  
750 which all the proteins sequences of these genomes were collected and analyzed using  
751 PhyloPhlAn, which infers a phylogenomic tree based on the most conserved 400  
752 bacterial protein sequences (41) (Supplemental Data S1D). These 117 genomes were  
753 then added to the eHOMDv15.1 as reference genomes. At least one genome from each  
754 taxon is dynamically annotated against a frequently updated NCBI nonredundant  
755 protein database so that potential functions may be assigned to hypothetical proteins  
756 due to matches to newly added proteins with functional annotation in NCBI nr database.

757

758 **ACKNOWLEDGEMENTS**

759 For supplying raw 16S rRNA gene tag sequences, we thank Melinda M. Pettigrew,  
760 Michele M. Sale and Emma Kaitlynn Allen. We are grateful to Vanja Klepac-Ceraj and  
761 Lauren N M Quigley for thoughtful editing and commentary on the manuscript, to  
762 Hardeep Ranu for her help in keeping the project on pace, and to members of the  
763 Lemon Lab and the Starr-Dewhirst-Johnston-Lemon Joint Group Meeting for helpful  
764 questions and suggestions throughout the project.

765 **Authorship contributions.** Conceived Project: IFE, FED, KPL. Designed Project: IFE,  
766 TC, YH, FED, KPL. Analyzed data: IFE, YH, TC, FED, PG. Interpreted results: IFE, YH,  
767 TC, FED, KPL. Generated figures and tables: IFE, TC, PG, YH, FED. Wrote manuscript:  
768 KPL, IFE, FED, TC, YH. All authors approved the final manuscript.

769 **Funding.** This work was funded in part by a pilot grant (IFE, KPL) from the Harvard  
770 Catalyst | The Harvard Clinical and Translational Science Center (National Center for  
771 Research Resources and the National Center for Advancing Translational Sciences,  
772 National Institutes of Health Award UL1 TR001102 and financial contributions from  
773 Harvard University and its affiliated academic health care centers), by the National  
774 Institute of General Medical Sciences under award number R01GM117174 (KPL), by  
775 the National Institute of Allergy and Infectious Diseases under award number  
776 R01AI101018 (KPL) and by the National Institute of Dental and Craniofacial Research  
777 under award numbers R37DE016937 and R01DE024468 (FED). The content is solely  
778 the responsibility of the authors and does not reflect the official views of the National  
779 Institutes of Health or other funding source. The authors report no conflicts of interest.

780

781 **REFERENCES**

- 782 1. Bomar L, Brugger SD, Lemon KP. 2018. Bacterial microbiota of the nasal  
783 passages across the span of human life. *Curr Opin Microbiol* 41:8-14.
- 784 2. Conlan S, Kong HH, Segre JA. 2012. Species-level analysis of DNA sequence  
785 data from the NIH Human Microbiome Project. *PLoS One* 7:e47075.
- 786 3. Eren AM, Morrison HG, Lescault PJ, Reveillaud J, Vineis JH, Sogin ML. 2015.  
787 Minimum entropy decomposition: unsupervised oligotyping for sensitive  
788 partitioning of high-throughput marker gene sequences. *The ISME journal* 9:968-  
789 79.
- 790 4. Callahan BJ, McMurdie PJ, Rosen MJ, Han AW, Johnson AJ, Holmes SP. 2016.  
791 DADA2: High-resolution sample inference from Illumina amplicon data. *Nat*  
792 *Methods* 13:581-3.
- 793 5. Chen T, Yu WH, Izard J, Baranova OV, Lakshmanan A, Dewhirst FE. 2010. The  
794 Human Oral Microbiome Database: a web accessible resource for investigating  
795 oral microbe taxonomic and genomic information. *Database (Oxford)*  
796 2010:baq013.
- 797 6. Dewhirst FE, Chen T, Izard J, Paster BJ, Tanner AC, Yu WH, Lakshmanan A,  
798 Wade WG. 2010. The human oral microbiome. *J Bacteriol* 192:5002-17.
- 799 7. Eren AM, Borisy GG, Huse SM, Mark Welch JL. 2014. Oligotyping analysis of the  
800 human oral microbiome. *Proceedings of the National Academy of Sciences of the*  
801 *United States of America* 111:E2875-84.

- 802 8. Mark Welch JL, Utter DR, Rossetti BJ, Mark Welch DB, Eren AM, Borisy GG. 2014.  
803 Dynamics of tongue microbial communities with single-nucleotide resolution using  
804 oligotyping. *Front Microbiol* 5:568.
- 805 9. Utter DR, Mark Welch JL, Borisy GG. 2016. Individuality, Stability, and Variability  
806 of the Plaque Microbiome. *Front Microbiol* 7:564.
- 807 10. Dickson RP, Erb-Downward JR, Martinez FJ, Huffnagle GB. 2016. The  
808 Microbiome and the Respiratory Tract. *Annu Rev Physiol* 78:481-504.
- 809 11. Grice EA, Kong HH, Conlan S, Deming CB, Davis J, Young AC, Bouffard GG,  
810 Blakesley RW, Murray PR, Green ED, Turner ML, Segre JA. 2009. Topographical  
811 and temporal diversity of the human skin microbiome. *Science* 324:1190-2.
- 812 12. Kong HH, Oh J, Deming C, Conlan S, Grice EA, Beatson MA, Nomicos E, Polley  
813 EC, Komarow HD, Murray PR, Turner ML, Segre JA. 2012. Temporal shifts in the  
814 skin microbiome associated with disease flares and treatment in children with  
815 atopic dermatitis. *Genome research* 22:850-9.
- 816 13. Oh J, Conlan S, Polley EC, Segre JA, Kong HH. 2012. Shifts in human skin and  
817 nares microbiota of healthy children and adults. *Genome medicine* 4:77.
- 818 14. Findley K, Oh J, Yang J, Conlan S, Deming C, Meyer JA, Schoenfeld D, Nomicos  
819 E, Park M, Kong HH, Segre JA. 2013. Topographic diversity of fungal and bacterial  
820 communities in human skin. *Nature* 498:367-70.
- 821 15. Oh J, Freeman AF, Park M, Sokolic R, Candotti F, Holland SM, Segre JA, Kong  
822 HH. 2013. The altered landscape of the human skin microbiome in patients with  
823 primary immunodeficiencies. *Genome research* 23:2103-14.

- 824 16. Oh J, Byrd AL, Deming C, Conlan S, Kong HH, Segre JA. 2014. Biogeography and  
825 individuality shape function in the human skin metagenome. *Nature* 514:59-64.
- 826 17. Rasmussen TT, Kirkeby LP, Poulsen K, Reinholdt J, Kilian M. 2000. Resident  
827 aerobic microbiota of the adult human nasal cavity. *Apmis* 108:663-75.
- 828 18. Boase S, Foreman A, Cleland E, Tan L, Melton-Kreft R, Pant H, Hu FZ, Ehrlich  
829 GD, Wormald PJ. 2013. The microbiome of chronic rhinosinusitis: culture,  
830 molecular diagnostics and biofilm detection. *BMC Infect Dis* 13:210.
- 831 19. Kaspar U, Kriegeskorte A, Schubert T, Peters G, Rudack C, Pieper DH, Wos-Oxley  
832 M, Becker K. 2016. The culturome of the human nose habitats reveals individual  
833 bacterial fingerprint patterns. *Environ Microbiol* 18:2130-42.
- 834 20. Tunney MM, Field TR, Moriarty TF, Patrick S, Doering G, Muhlebach MS,  
835 Wolfgang MC, Boucher R, Gilpin DF, McDowell A, Elborn JS. 2008. Detection of  
836 anaerobic bacteria in high numbers in sputum from patients with cystic fibrosis. *Am*  
837 *J Respir Crit Care Med* 177:995-1001.
- 838 21. Laufer AS, Metlay JP, Gent JF, Fennie KP, Kong Y, Pettigrew MM. 2011. Microbial  
839 communities of the upper respiratory tract and otitis media in children. *MBio*  
840 2:e00245-10.
- 841 22. Allen EK, Koeppl AF, Hendley JO, Turner SD, Winther B, Sale MM. 2014.  
842 Characterization of the nasopharyngeal microbiota in health and during rhinovirus  
843 challenge. *Microbiome* 2:22.
- 844 23. Human Microbiome Project C. 2012. Structure, function and diversity of the healthy  
845 human microbiome. *Nature* 486:207-14.

- 846 24. Human Microbiome Project C. 2012. A framework for human microbiome research.  
847 Nature 486:215-21.
- 848 25. Pei Z, Bini EJ, Yang L, Zhou M, Francois F, Blaser MJ. 2004. Bacterial biota in the  
849 human distal esophagus. Proc Natl Acad Sci U S A 101:4250-5.
- 850 26. Pei Z, Yang L, Peek RM, Jr Levine SM, Pride DT, Blaser MJ. 2005. Bacterial biota  
851 in reflux esophagitis and Barrett's esophagus. World J Gastroenterol 11:7277-83.
- 852 27. Harris JK, De Groote MA, Sagel SD, Zemanick ET, Kapsner R, Penvari C, Kaess  
853 H, Deterding RR, Accurso FJ, Pace NR. 2007. Molecular identification of bacteria  
854 in bronchoalveolar lavage fluid from children with cystic fibrosis. Proc Natl Acad  
855 Sci U S A 104:20529-33.
- 856 28. O'Leary NA, Wright MW, Brister JR, Ciufo S, Haddad D, McVeigh R, Rajput B,  
857 Robbertse B, Smith-White B, Ako-Adjei D, Astashyn A, Badretdin A, Bao Y,  
858 Blinkova O, Brover V, Chetvernin V, Choi J, Cox E, Ermolaeva O, Farrell CM,  
859 Goldfarb T, Gupta T, Haft D, Hatcher E, Hlavina W, Joardar VS, Kodali VK, Li W,  
860 Maglott D, Masterson P, McGarvey KM, Murphy MR, O'Neill K, Pujar S, Rangwala  
861 SH, Rausch D, Riddick LD, Schoch C, Shkeda A, Storz SS, Sun H, Thibaud-  
862 Nissen F, Tolstoy I, Tully RE, Vatsan AR, Wallin C, Webb D, Wu W, Landrum MJ,  
863 Kimchi A, et al. 2016. Reference sequence (RefSeq) database at NCBI: current  
864 status, taxonomic expansion, and functional annotation. Nucleic Acids Res  
865 44:D733-45.
- 866 29. Cole JR, Wang Q, Fish JA, Chai B, McGarrell DM, Sun Y, Brown CT, Porras-Alfaro  
867 A, Kuske CR, Tiedje JM. 2014. Ribosomal Database Project: data and tools for  
868 high throughput rRNA analysis. Nucleic Acids Res 42:D633-42.

- 869 30. Yilmaz P, Parfrey LW, Yarza P, Gerken J, Priesse E, Quast C, Schweer T, Peplies  
870 J, Ludwig W, Glockner FO. 2014. The SILVA and "All-species Living Tree Project  
871 (LTP)" taxonomic frameworks. *Nucleic Acids Res* 42:D643-8.
- 872 31. Quast C, Priesse E, Yilmaz P, Gerken J, Schweer T, Yarza P, Peplies J, Glockner  
873 FO. 2013. The SILVA ribosomal RNA gene database project: improved data  
874 processing and web-based tools. *Nucleic Acids Res* 41:D590-6.
- 875 32. McDonald D, Price MN, Goodrich J, Nawrocki EP, DeSantis TZ, Probst A,  
876 Andersen GL, Knight R, Hugenholtz P. 2012. An improved Greengenes taxonomy  
877 with explicit ranks for ecological and evolutionary analyses of bacteria and  
878 archaea. *ISME J* 6:610-8.
- 879 33. Edgar R. 2018. Taxonomy annotation and guide tree errors in 16S rRNA  
880 databases. *PeerJ* 6:e5030.
- 881 34. Meisel JS, Hannigan GD, Tyldsley AS, SanMiguel AJ, Hodkinson BP, Zheng Q,  
882 Grice EA. 2016. Skin Microbiome Surveys Are Strongly Influenced by  
883 Experimental Design. *J Invest Dermatol* 136:947-56.
- 884 35. Khamis A, Raoult D, La Scola B. 2004. *rpoB* gene sequencing for identification of  
885 *Corynebacterium* species. *J Clin Microbiol* 42:3925-31.
- 886 36. Chakravorty S, Helb D, Burday M, Connell N, Alland D. 2007. A detailed analysis  
887 of 16S ribosomal RNA gene segments for the diagnosis of pathogenic bacteria.  
888 *Journal of microbiological methods* 69:330-9.
- 889 37. Camarinha-Silva A, Jauregui R, Chaves-Moreno D, Oxley AP, Schaumburg F,  
890 Becker K, Wos-Oxley ML, Pieper DH. 2014. Comparing the anterior nare bacterial

- 891 community of two discrete human populations using Illumina amplicon  
892 sequencing. *Environ Microbiol* 16:2939-52.
- 893 38. Flanagan JL, Brodie EL, Weng L, Lynch SV, Garcia O, Brown R, Hugenholtz P,  
894 DeSantis TZ, Andersen GL, Wiener-Kronish JP, Bristow J. 2007. Loss of bacterial  
895 diversity during antibiotic treatment of intubated patients colonized with  
896 *Pseudomonas aeruginosa*. *J Clin Microbiol* 45:1954-62.
- 897 39. Perkins SD, Woeltje KF, Angenent LT. 2010. Endotracheal tube biofilm inoculation  
898 of oral flora and subsequent colonization of opportunistic pathogens. *Int J Med*  
899 *Microbiol* 300:503-11.
- 900 40. van der Gast CJ, Walker AW, Stressmann FA, Rogers GB, Scott P, Daniels TW,  
901 Carroll MP, Parkhill J, Bruce KD. 2011. Partitioning core and satellite taxa from  
902 within cystic fibrosis lung bacterial communities. *ISME J* 5:780-91.
- 903 41. Segata N, Bornigen D, Morgan XC, Huttenhower C. 2013. PhyloPhlAn is a new  
904 method for improved phylogenetic and taxonomic placement of microbes. *Nat*  
905 *Commun* 4:2304.
- 906 42. Wang Q, Garrity GM, Tiedje JM, Cole JR. 2007. Naive Bayesian classifier for rapid  
907 assignment of rRNA sequences into the new bacterial taxonomy. *Appl Environ*  
908 *Microbiol* 73:5261-7.
- 909 43. Werner JJ, Koren O, Hugenholtz P, DeSantis TZ, Walters WA, Caporaso JG,  
910 Angenent LT, Knight R, Ley RE. 2012. Impact of training sets on classification of  
911 high-throughput bacterial 16s rRNA gene surveys. *ISME J* 6:94-103.
- 912 44. Wade WG. 2015. Eubacterium, *Bergey's Manual of Systematics of Archaea and*  
913 *Bacteria* doi:doi:10.1002/9781118960608.gbm00629.



- 914 45. Schloss PD, Westcott SL, Ryabin T, Hall JR, Hartmann M, Hollister EB, Lesniewski  
915 RA, Oakley BB, Parks DH, Robinson CJ, Sahl JW, Stres B, Thallinger GG, Van  
916 Horn DJ, Weber CF. 2009. Introducing mothur: open-source, platform-  
917 independent, community-supported software for describing and comparing  
918 microbial communities. *Appl Environ Microbiol* 75:7537-41.
- 919 46. Buels R, Yao E, Diesh CM, Hayes RD, Munoz-Torres M, Helt G, Goodstein DM,  
920 Elsik CG, Lewis SE, Stein L, Holmes IH. 2016. JBrowse: a dynamic web platform  
921 for genome visualization and analysis. *Genome Biol* 17:66.
- 922 47. Brugger SD, Bomar L, Lemon KP. 2016. Commensal-Pathogen Interactions along  
923 the Human Nasal Passages. *PLoS pathogens* 12:e1005633.
- 924 48. Akmatov MK, Koch N, Vital M, Ahrens W, Flesch-Janys D, Fricke J, Gatzemeier  
925 A, Greiser H, Gunther K, Illig T, Kaaks R, Krone B, Kuhn A, Linseisen J, Meisinger  
926 C, Michels K, Moebus S, Nieters A, Obi N, Schultze A, Six-Merker J, Pieper DH,  
927 Pessler F. 2017. Determination of nasal and oropharyngeal microbiomes in a  
928 multicenter population-based study - findings from Pretest 1 of the German  
929 National Cohort. *Sci Rep* 7:1855.
- 930 49. Bell ME, Bernard KA, Harrington SM, Patel NB, Tucker TA, Metcalfe MG,  
931 McQuiston JR. 2016. *Lawsonella clevelandensis* gen. nov., sp. nov., a new  
932 member of the suborder *Corynebacterineae* isolated from human abscesses. *Int J*  
933 *Syst Evol Microbiol* 66:2929-35.
- 934 50. Nicholson AC, Bell M, Humrighouse BW, McQuiston JR. 2015. Complete Genome  
935 Sequences for Two Strains of a Novel Fastidious, Partially Acid-Fast, Gram-

- 936 Positive *Corynebacterineae* Bacterium, Derived from Human Clinical Samples.  
937 Genome Announc 3.
- 938 51. Harrington SM, Bell M, Bernard K, Lagace-Wiens P, Schuetz AN, Hartman B,  
939 McQuiston JR, Wilson D, Lasalvia M, Ng B, Richter S, Taege A. 2013. Novel  
940 fastidious, partially acid-fast, anaerobic Gram-positive bacillus associated with  
941 abscess formation and recovered from multiple medical centers. J Clin Microbiol  
942 51:3903-7.
- 943 52. Francuzik W, Franke K, Schumann RR, Heine G, Worm M. 2018.  
944 Propionibacterium acnes Abundance Correlates Inversely with *Staphylococcus*  
945 *aureus*: Data from Atopic Dermatitis Skin Microbiome. Acta Derm Venereol  
946 98:490-495.
- 947 53. Fodor AA, DeSantis TZ, Wylie KM, Badger JH, Ye Y, Hepburn T, Hu P, Sodergren  
948 E, Liolios K, Huot-Creasy H, Birren BW, Earl AM. 2012. The "most wanted" taxa  
949 from the human microbiome for whole genome sequencing. PLoS One 7:e41294.
- 950 54. Lagier JC, Khelaifia S, Alou MT, Ndongo S, Dione N, Hugon P, Caputo A, Cadoret  
951 F, Traore SI, Seck EH, Dubourg G, Durand G, Mourembou G, Guilhot E, Togo A,  
952 Bellali S, Bachar D, Cassir N, Bittar F, Delerce J, Mailhe M, Ricaboni D, Bilen M,  
953 Dangui Niekou NP, Dia Badiane NM, Valles C, Mouelhi D, Diop K, Million M, Musso  
954 D, Abrahao J, Azhar EI, Bibi F, Yasir M, Diallo A, Sokhna C, Djossou F, Vitton V,  
955 Robert C, Rolain JM, La Scola B, Fournier PE, Levasseur A, Raoult D. 2016.  
956 Culture of previously uncultured members of the human gut microbiota by  
957 culturomics. Nat Microbiol 1:16203.

- 958 55. Mandal S, Van Treuren W, White RA, Eggesbo M, Knight R, Peddada SD. 2015.  
959 Analysis of composition of microbiomes: a novel method for studying microbial  
960 composition. *Microb Ecol Health Dis* 26:27663.
- 961 56. Wertheim HF, Melles DC, Vos MC, van Leeuwen W, van Belkum A, Verbrugh HA,  
962 Nouwen JL. 2005. The role of nasal carriage in *Staphylococcus aureus* infections.  
963 *Lancet Infect Dis* 5:751-62.
- 964 57. Dantes R, Mu Y, Belflower R, Aragon D, Dumyati G, Harrison LH, Lessa FC,  
965 Lynfield R, Nadle J, Petit S, Ray SM, Schaffner W, Townes J, Fridkin S, Emerging  
966 Infections Program-Active Bacterial Core Surveillance MSI. 2013. National burden  
967 of invasive methicillin-resistant *Staphylococcus aureus* infections, United States,  
968 2011. *JAMA Intern Med* 173:1970-8.
- 969 58. Young BC, Wu CH, Gordon NC, Cole K, Price JR, Liu E, Sheppard AE, Perera S,  
970 Charlesworth J, Golubchik T, Iqbal Z, Bowden R, Massey RC, Paul J, Crook DW,  
971 Peto TE, Walker AS, Llewelyn MJ, Wyllie DH, Wilson DJ. 2017. Severe infections  
972 emerge from commensal bacteria by adaptive evolution. *Elife* 6.
- 973 59. Gorwitz RJ, Kruszon-Moran D, McAllister SK, McQuillan G, McDougal LK,  
974 Fosheim GE, Jensen BJ, Killgore G, Tenover FC, Kuehnert MJ. 2008. Changes in  
975 the prevalence of nasal colonization with *Staphylococcus aureus* in the United  
976 States, 2001-2004. *J Infect Dis* 197:1226-34.
- 977 60. Bode LG, Kluytmans JA, Wertheim HF, Bogaers D, Vandenbroucke-Grauls CM,  
978 Roosendaal R, Troelstra A, Box AT, Voss A, van der Tweel I, van Belkum A,  
979 Verbrugh HA, Vos MC. 2010. Preventing surgical-site infections in nasal carriers  
980 of *Staphylococcus aureus*. *N Engl J Med* 362:9-17.

- 981 61. Proctor RA. 2015. Recent developments for *Staphylococcus aureus* vaccines:  
982 clinical and basic science challenges. Eur Cell Mater 30:315-26.
- 983 62. Missiakas D, Schneewind O. 2016. *Staphylococcus aureus* vaccines: Deviating  
984 from the carol. J Exp Med 213:1645-53.
- 985 63. Janek D, Zipperer A, Kulik A, Krismer B, Peschel A. 2016. High Frequency and  
986 Diversity of Antimicrobial Activities Produced by Nasal *Staphylococcus* Strains  
987 against Bacterial Competitors. PLoS Pathog 12:e1005812.
- 988 64. Zipperer A, Konnerth MC, Laux C, Berscheid A, Janek D, Weidenmaier C, Burian  
989 M, Schilling NA, Slavetinsky C, Marschal M, Willmann M, Kalbacher H, Schitteck B,  
990 Brotz-Oesterhelt H, Grond S, Peschel A, Krismer B. 2016. Human commensals  
991 producing a novel antibiotic impair pathogen colonization. Nature 535:511-6.
- 992 65. Nakatsuji T, Chen TH, Narala S, Chun KA, Two AM, Yun T, Shafiq F, Kotol PF,  
993 Bouslimani A, Melnik AV, Latif H, Kim JN, Lockhart A, Artis K, David G, Taylor P,  
994 Streib J, Dorrestein PC, Grier A, Gill SR, Zengler K, Hata TR, Leung DY, Gallo RL.  
995 2017. Antimicrobials from human skin commensal bacteria protect against  
996 *Staphylococcus aureus* and are deficient in atopic dermatitis. Sci Transl Med 9.
- 997 66. Paharik AE, Parlet CP, Chung N, Todd DA, Rodriguez EI, Van Dyke MJ, Cech NB,  
998 Horswill AR. 2017. Coagulase-Negative Staphylococcal Strain Prevents  
999 *Staphylococcus aureus* Colonization and Skin Infection by Blocking Quorum  
1000 Sensing. Cell Host Microbe 22:746-756 e5.
- 1001 67. Aguirre M, Morrison D, Cookson BD, Gay FW, Collins MD. 1993. Phenotypic and  
1002 phylogenetic characterization of some *Gemella*-like organisms from human

- 1003 infections: description of *Dolosigranulum pigrum* gen. nov., sp. nov. J Appl  
1004 Bacteriol 75:608-12.
- 1005 68. Liu CM, Price LB, Hungate BA, Abraham AG, Larsen LA, Christensen K, Stegger  
1006 M, Skov R, Andersen PS. 2015. *Staphylococcus aureus* and the ecology of the  
1007 nasal microbiome. Science Advances 1.
- 1008 69. Jensen A, Scholz CF, Kilian M. 2016. Re-evaluation of the taxonomy of the Mitis  
1009 group of the genus *Streptococcus* based on whole genome phylogenetic analyses,  
1010 and proposed reclassification of *Streptococcus dentisani* as *Streptococcus oralis*  
1011 subsp. *dentisani* comb. nov., *Streptococcus tigurinus* as *Streptococcus oralis*  
1012 subsp. *tigurinus* comb. nov., and *Streptococcus oligofermentans* as a later  
1013 synonym of *Streptococcus cristatus*. Int J Syst Evol Microbiol 66:4803-4820.
- 1014 70. Scholz CF, Kilian M. 2016. The natural history of cutaneous propionibacteria, and  
1015 reclassification of selected species within the genus *Propionibacterium* to the  
1016 proposed novel genera *Acidipropionibacterium* gen. nov., *Cutibacterium* gen. nov.  
1017 and *Pseudopropionibacterium* gen. nov. Int J Syst Evol Microbiol 66:4422-4432.
- 1018 71. Caporaso JG, Kuczynski J, Stombaugh J, Bittinger K, Bushman FD, Costello EK,  
1019 Fierer N, Pena AG, Goodrich JK, Gordon JI, Huttley GA, Kelley ST, Knights D,  
1020 Koenig JE, Ley RE, Lozupone CA, McDonald D, Muegge BD, Pirrung M, Reeder  
1021 J, Sevinsky JR, Turnbaugh PJ, Walters WA, Widmann J, Yatsunenko T, Zaneveld  
1022 J, Knight R. 2010. QIIME allows analysis of high-throughput community  
1023 sequencing data. Nat Methods 7:335-6.

- 1024 72. Caporaso JG, Bittinger K, Bushman FD, DeSantis TZ, Andersen GL, Knight R.  
1025 2010. PyNAST: a flexible tool for aligning sequences to a template alignment.  
1026 *Bioinformatics* 26:266-7.
- 1027 73. Katoh K, Asimenos G, Toh H. 2009. Multiple alignment of DNA sequences with  
1028 MAFFT. *Methods Mol Biol* 537:39-64.
- 1029 74. Price MN, Dehal PS, Arkin AP. 2010. FastTree 2--approximately maximum-  
1030 likelihood trees for large alignments. *PLoS One* 5:e9490.

1031

1032 **FIGURE LEGENDS**

1033 **Figure 1. The process for identifying Human Microbial Taxa (HMTs) from the**  
1034 **aerodigestive tract to generate the eHOMD.** Schematic of the approach used to  
1035 identify taxa that were added as Human Microbial Taxa (HMT) to generate the  
1036 eHOMDv15.04. Colored boxes are indicative of databases (blue), datasets (gray), newly  
1037 added HMTs (green) and newly added eHOMDrefs for present HMTs (orange).  
1038 Performance of blastn is indicated by yellow ovals and other tasks in white rectangles.  
1039 HMT replaces the old HOMD taxonomy prefix HOT (human oral taxon). **(A)** Process for  
1040 generating the provisional eHOMDv15.01 by adding bacterial species from culture-  
1041 dependent studies. **(B and C)** Process for generating the provisional eHOMDv15.02 by  
1042 identifying additional HMTs from a dataset of 16S rRNA gene clones from human  
1043 nostrils. **(D and E)** Process for generating the provisional eHOMDv15.03 by identifying  
1044 additional candidate taxa from culture-independent studies of aerodigestive tract  
1045 microbiomes. **(F and G)** Process for generating the provisional eHOMDv15.04 by  
1046 identifying additional candidate taxa from a dataset of 16S rRNA gene clones from

1047 human skin. Please see Methods for detailed description of A–G. Abbreviations: NCBI  
1048 16S is the NCBI 16 Microbial database, eHOMDref is eHOMD reference sequence, db  
1049 is database and ident is identity. Datasets included SKns (11-16), Allen et al. (22),  
1050 Laufer et al. (21), Pei et al. (25, 26) and Harris et al. (27). Kaspar et al. (19).

1051

1052 **Figure 2. A small number of genera and species account for the majority of taxa**

1053 **in the HMP nares V1-V3 dataset at both an overall and individual level.** Taxa

1054 identified in the reanalysis of the HMP nostril V1-V3 dataset graphed based on

1055 cumulative relative abundance of sequences at the genus- **(A)** and

1056 species/supraspecies- **(C)** level. The top 10 taxa are labeled. Prevalence (Prev) in % is

1057 indicated by the color gradient. The genus *Cutibacterium* includes species formerly

1058 known as the cutaneous *Propionibacterium* species, e.g., *P. acnes* (70). The minimum

1059 number of taxa at the genus- **(B)** and species/supraspecies- **(D)** level that accounted for

1060 90% of the total sequences in each person's sample based on a table of taxa ranked by

1061 cumulative abundance from greatest to least. Ten or fewer species/supraspecies

1062 accounted for 90% of the sequences in 94% of the 210 HMP participants in this

1063 reanalysis. The cumulative relative abundance of sequences does not reach 100%

1064 because **(A)** 1.5% of the reads could not be assigned a genus and **(B)** 4.9% of the

1065 reads could not be assigned a species/supraspecies.

1066

1067 **Figure 3. Three common nasal species/supraspecies exhibit increased differential**

1068 **relative abundance when *S. aureus* is absent from the nostril microbiome.** In

1069 contrast, no other species showed differential abundance based on the

1070 presence/absence of *Neisseriaceae* [G-1] bacterium HMT-174 or *Lawsonella*  
1071 *clevelandensis*. We used ANCOM to analyze species/supraspecies-level composition of  
1072 the HMP nares V1-V3 dataset when (A) *Neisseriaceae* [G-1] bacterium HMT-174, (B) *L.*  
1073 *clevelandensis* (*Lcl*) or (C) *S. aureus* (*Sau*) were either absent (-) or present (+). Results  
1074 were corrected for multiple testing. The dark bar represents the median, and lower and  
1075 upper hinges correspond to the first and third quartiles. Each gray dot represents a  
1076 sample, and multiple overlapping dots appear black. *Coryne. acc\_mac\_tub* represents  
1077 the supraspecies *Corynebacterium accolens\_macginleyi\_tuberculostearicum*.

1078

1079

1080

1081

1082

1083

1084

## 1085 TABLES

1086 **Table 1. The eHOMD outperforms comparable databases for species-level**  
1087 **taxonomic assignment to 16S rRNA reads from nostril samples (SKn dataset).**

| Database        | # Reads Identified <sup>a</sup> | % Reads Identified <sup>a</sup> |
|-----------------|---------------------------------|---------------------------------|
| HOMDv14.5       | 22,274                          | 50.2                            |
| eHOMDv15.1      | 42,197                          | 95.1                            |
| SILVA128        | 40,597                          | 91.5                            |
| RDP16           | 38,815                          | 87.5                            |
| NCBI 16S        | 38,337                          | 86.4                            |
| Greengenes GOLD | 31,195                          | 70.3                            |

1088 <sup>a</sup>Reads identified via blastn at 98.5% identity and 98% coverage



1089 **Table 2. Performance of eHOMD and comparable databases for species-level taxonomic assignment to 16S rRNA gene**  
 1090 **datasets from sites throughout the human aerodigestive tract.**

| Dataset                 | 16S Region | 16S Primers                  | Sequencing Technique | Sample Type                    | # Samples                                    | # Reads analyzed | Database   | # Reads Identified <sup>a</sup> | % Reads Identified <sup>a</sup> |
|-------------------------|------------|------------------------------|----------------------|--------------------------------|----------------------------------------------|------------------|------------|---------------------------------|---------------------------------|
| Laufer-Pettigrew (2011) | V1-V2      | 27F<br>338R                  | Roche/454            | Nostril swab                   | 108 children (108 samples)                   | 120274           | eHOMDv15.1 | 96233                           | 80.0                            |
|                         |            |                              |                      |                                |                                              |                  | SILVA128   | 97233                           | 80.8                            |
|                         |            |                              |                      |                                |                                              |                  | RDP16      | 97464                           | <b>81.0</b>                     |
|                         |            |                              |                      |                                |                                              |                  | NCBI 16S   | 87082                           | 72.4                            |
| Allen-Sale (2014)       | V1-V3      | 27F<br>534R                  | 454-FLX              | Nasal lavage fluid             | 10 adults (97 samples)                       | 75310            | eHOMDv15.1 | 68594                           | 91.1                            |
|                         |            |                              |                      |                                |                                              |                  | SILVA128   | 69082                           | <b>91.7</b>                     |
|                         |            |                              |                      |                                |                                              |                  | RDP16      | 65028                           | 86.4                            |
|                         |            |                              |                      |                                |                                              |                  | NCBI 16S   | 63892                           | 84.8                            |
| Pei-Blaser (2004;2005)  | CL         | 318F<br>1519R<br>8F<br>1513R | CL                   | Esophageal biopsies            | 4 (10 libraries each)                        | 7414             | eHOMDv15.1 | 7276                            | <b>98.1</b>                     |
|                         |            |                              |                      |                                |                                              |                  | SILVA128   | 7019                            | 94.7                            |
|                         |            |                              |                      |                                |                                              |                  | RDP16      | 6847                            | 92.4                            |
|                         |            |                              |                      |                                |                                              |                  | NCBI 16S   | 6686                            | 90.2                            |
| Harris-Pace (2007)      | CL         | 27F<br>907R                  | CL                   | Brochial alveolar lavage fluid | 57 children (50 libraries CF and 19 control) | 3203             | eHOMDv15.1 | 2684                            | <b>83.8</b>                     |
|                         |            |                              |                      |                                |                                              |                  | SILVA128   | 2633                            | 82.2                            |
|                         |            |                              |                      |                                |                                              |                  | RDP16      | 2500                            | 78.1                            |
|                         |            |                              |                      |                                |                                              |                  | NCBI 16S   | 2427                            | 75.8                            |
| HMPnV1-V3               | V1-V3      | 27F<br>534R                  | Roche/454            | Nostril swab                   | 227 adults (363 samples) <sup>b</sup>        | 2338563          | eHOMDv15.1 | 2133083                         | <b>91.2</b>                     |
|                         |            |                              |                      |                                |                                              |                  | SILVA128   | 2035882                         | 87.1                            |
|                         |            |                              |                      |                                |                                              |                  | RDP16      | 1965611                         | 84.1                            |
|                         |            |                              |                      |                                |                                              |                  | NCBI 16S   | 1932732                         | 82.6                            |
| vanderGast-Bruce (2011) | CL         | 7F<br>1510R                  | CL                   | Expectorated Sputa             | 14 adults (CF)                               | 2137             | eHOMDv15.1 | 2123                            | <b>99.3</b>                     |
|                         |            |                              |                      |                                |                                              |                  | SILVA128   | 2084                            | 97.5                            |
|                         |            |                              |                      |                                |                                              |                  | RDP16      | 2057                            | 96.3                            |
|                         |            |                              |                      |                                |                                              |                  | NCBI 16S   | 2045                            | 95.7                            |
| Flanagan-Bristow (2007) | CL         | 27F<br>1492R                 | CL                   | Endotracheal tube aspirate     | 6 adults, 1 children (2-5 samples each)      | 3278             | eHOMDv15.1 | 3193                            | 97.4                            |
|                         |            |                              |                      |                                |                                              |                  | SILVA128   | 3199                            | <b>97.6</b>                     |
|                         |            |                              |                      |                                |                                              |                  | RDP16      | 3193                            | 97.4                            |
|                         |            |                              |                      |                                |                                              |                  | NCBI 16S   | 3186                            | 97.2                            |

1091

|                                |    |             |    |                                   |          |      |                                             |                            |                                     |
|--------------------------------|----|-------------|----|-----------------------------------|----------|------|---------------------------------------------|----------------------------|-------------------------------------|
| Perkins-<br>Angenent<br>(2010) | CL | 8F<br>1391R | CL | Extubated<br>endotracheal<br>tube | 8 adults | 1263 | eHOMDv15.1<br>SILVA128<br>RDP16<br>NCBI 16S | 1008<br>1000<br>916<br>832 | <b>79.8</b><br>79.2<br>72.5<br>65.9 |
|--------------------------------|----|-------------|----|-----------------------------------|----------|------|---------------------------------------------|----------------------------|-------------------------------------|

1092 <sup>a</sup>Reads identified via blastn at 98.5% identity and 98% coverage

1093 <sup>b</sup>See Supplemental Methods

1094 CL = Clone library; CF = Cystic Fibrosis

1095

1096

1097 **Table 3. The number of species-level taxa in eHOMDv15.1 that are indistinguishable at various % identity thresholds for**

1098 **16S rRNA regions V1-V3 and V3-V4**

| <b>% identity</b> | <b>V1-V3</b> | <b>V3-V4</b> |
|-------------------|--------------|--------------|
| 99                | 37           | 269          |
| 99.5              | 22           | 171          |
| 100               | 14           | 63           |

1099

1100

1101 **Table 4. For nonnasal skin samples, the eHOMD performs best for species-level taxonomic assignment to 16S rRNA**  
 1102 **reads from oily skin sites (SKs dataset).**

| <b>Skin_site</b>                         | <b>Skin type</b> | <b>Clones</b> | <b>eHOMD<sup>a</sup></b> | <b>SILVA128<sup>a</sup></b> | <b>RDP16<sup>a</sup></b> | <b>NCBI 16S<sup>a</sup></b> | <b>eHOMD minus SILVA</b> |
|------------------------------------------|------------------|---------------|--------------------------|-----------------------------|--------------------------|-----------------------------|--------------------------|
| Alar crease                              | Oily             | 4149          | <b>98.1</b>              | 95.4                        | 82.3                     | 82.1                        | <b>2.7</b>               |
| External auditory canal                  | Oily             | 4970          | <b>97.6</b>              | 90.2                        | 87.6                     | 87.4                        | <b>7.4</b>               |
| Back                                     | Oily             | 4552          | <b>95.6</b>              | 92.5                        | 92.2                     | 92.2                        | <b>3.1</b>               |
| Glabella                                 | Oily             | 4287          | <b>95.0</b>              | 92.5                        | 80.4                     | 79.8                        | <b>2.5</b>               |
| Manubrium                                | Oily             | 4442          | <b>93.5</b>              | 91.0                        | 88.8                     | 88.5                        | <b>2.5</b>               |
| Retroauricular crease                    | Oily             | 15953         | 92.7                     | <b>93.4</b>                 | 91.9                     | 91.5                        | -0.7                     |
| Toe web space                            | Moist            | 4810          | <b>89.4</b>              | 88.7                        | 88.3                     | 87.5                        | 0.7                      |
| Occiput                                  | Oily             | 8898          | 88.2                     | <b>88.4</b>                 | 78.5                     | 78.1                        | -0.2                     |
| Elbow                                    | Dry              | 2181          | <b>87.6</b>              | 78.1                        | 77.1                     | 76.5                        | <b>9.5</b>               |
| Antecubital fossa                        | Moist            | 99077         | 85.4                     | <b>88.2</b>                 | 86.9                     | 85.4                        | -2.8                     |
| Gluteal crease                           | Moist            | 4656          | <b>84.5</b>              | 84.3                        | 83.2                     | 81.5                        | 0.2                      |
| Hypothenar palm                          | Dry              | 3650          | 84.5                     | <b>92.1</b>                 | 87.9                     | 89.1                        | -7.6                     |
| Inguinal crease                          | Moist            | 5031          | <b>83.7</b>              | 83.5                        | 81.6                     | 82.3                        | 0.2                      |
| Plantar heel                             | Moist            | 4013          | 82.8                     | <b>83.9</b>                 | 83.2                     | 82.4                        | -1.1                     |
| Volar forearm                            | Dry              | 92792         | 82.4                     | <b>85.7</b>                 | 84.1                     | 82.6                        | -3.3                     |
| Interdigital web space                   | Moist            | 3883          | 79.1                     | <b>88.3</b>                 | 85.7                     | 85.2                        | -9.2                     |
| Popliteal fossa                          | Moist            | 75284         | 78.5                     | <b>86.1</b>                 | 84.9                     | 83.8                        | -7.6                     |
| Buttock                                  | Dry              | 4653          | 76.7                     | <b>77.6</b>                 | 76.4                     | 75.6                        | -0.9                     |
| Axillary vault                           | Moist            | 10148         | 72.1                     | <b>91.5</b>                 | 72.3                     | 70.7                        | -19.4                    |
| Umbilicus                                | Moist            | 4883          | 69.5                     | <b>76.4</b>                 | 72.2                     | 74.5                        | -6.9                     |
| <b>TOTAL SKIN (Non-nasal sites: SKs)</b> |                  | 362313        | 83.5                     | <b>86.7</b>                 | 84.8                     | 83.7                        | -3.2                     |
| <b>Nostrils (nares; SKn)</b>             | Moist            | 44374         | <b>95.1</b>              | 91.5                        | 87.5                     | 86.4                        | <b>3.6</b>               |

1103 <sup>a</sup>Reads identified via blastn at 98.5% identity and 98% coverage

1104 Color code: oily (blue), dry (red), and moist (green)

1105

16 **Table 5. Summary of eHOMD data at the phylum level**

| <b>Phylum</b>            | <b># Taxa</b> | <b># eHOMDrefs</b> | <b># Genomes</b> |
|--------------------------|---------------|--------------------|------------------|
| Absconditabacteria (SR1) | 5             | 3                  | 1                |
| Actinobacteria           | 118           | 153                | 292              |
| Bacteroidetes            | 125           | 179                | 133              |
| Chlamydiae               | 1             | 1                  | 5                |
| Chlorobi                 | 3             | 0                  | 3                |
| Chloroflexi              | 3             | 1                  | 4                |
| Cyanobacteria            | 1             | 2                  | 1                |
| Euryarchaeota            | 1             | 0                  | 1                |
| Firmicutes               | 266           | 341                | 581              |
| Fusobacteria             | 37            | 46                 | 60               |
| Gracilibacteria (GN02)   | 5             | 3                  | 2                |
| Proteobacteria           | 141           | 174                | 393              |
| Saccharibacteria (TM7)   | 19            | 16                 | 7                |
| Spirochaetes             | 50            | 64                 | 35               |
| Synergistetes            | 8             | 15                 | 8                |
| WPS-2                    | 1             | 0                  | 1                |
| <b>Total</b>             | <b>784</b>    | <b>998</b>         | <b>1527</b>      |

17 Data was compiled at the time of writing this paper, for updated summary and at different taxonomy  
18 levels visit the eHOMD web site [http://www.homd.org/index.php?name=HOMD&taxonomy\\_level=1](http://www.homd.org/index.php?name=HOMD&taxonomy_level=1)

## SUPPLEMENTAL FILES

### **Supplemental File 1: Supplemental Methods**

**Supplemental File 2: Supplemental Data S1.** Stable links to high-resolution visualizations at ehomd.org of the phylogenetic trees referred in this manuscript (**A-E**).

**Supplemental File 3: Table S1.** The expanded eHOMDv15.1 was generated by (**A**) identifying candidate taxa from culture-dependent studies, (**B**) 16S rRNA gene clones from human nostrils and (**C**) skin and culture-independent studies of aerodigestive tract microbiomes.

**Supplemental File 4: Table S2.** Comparison of the taxonomic assignment at species-level by blastn of the SKn clones using eHOMDv15.1 vs. SILVA128 revealed a subset of reads that were classified as captured at 98.5% identity and 98% coverage by both databases but (**A**) had differential species-level assignment, (**B**) were identified only with SILVA, or (**C**) were identified only with eHOMDv15.1.

**Supplemental File 5: Table S3.** The subsets of taxa that collapsed into undifferentiated groups at each percent identity threshold (100%, 99.5% and 99%) for the (**A-C**) V1-V3 and (**D-F**) V3-V4 regions of the 16S rRNA gene, respectively.

**Supplemental File 6: Table S4.** (**A**) Genus and (**B**) species/supraspecies rank order abundance of sequences in the reanalysis of the HMP nares V1-V3 16S rRNA gene dataset.

**Supplemental File 7: Table S5.** Identification of taxa with a preference for the human nasal habitat using the SKn and SKs datasets.

**Supplemental File 8: Table S6.** Summary of additions in the current expansion of HOMD in order to generate eHOMDv15.1, including (**A**) new eHOMDrefs added to both new and existing HMTs, (**B**) and newly added genomes.

**Supplemental File 9: Table S7.** Table of counts per sample and taxa in the HMP nares V1-V3 dataset result of the reanalysis at the species/supraspecies level.

4 **Supplemental File 10: Figure S1.** The percentage of 16S rRNA gene sequences identified via blastn  
5 declines sharply at identity thresholds above 98.5% across the range of coverage tested. We  
6 analyzed blastn results of **(A)** the SKn clone library dataset, as an example of a full-length 16S rRNA  
7 gene dataset, and **(B)** the HMP nares V1-V3 16S rRNA dataset, as an example of a short NGS-  
8 generated dataset, against four different databases. The grey panels on top show the range of %  
9 coverage used. The x-axis represents the range of % identity thresholds used. Each database is  
0 represented in a different color (see key). Based on these results, we chose to use a threshold of  
1 98.5% identity and 98% coverage for blastn analysis.

2

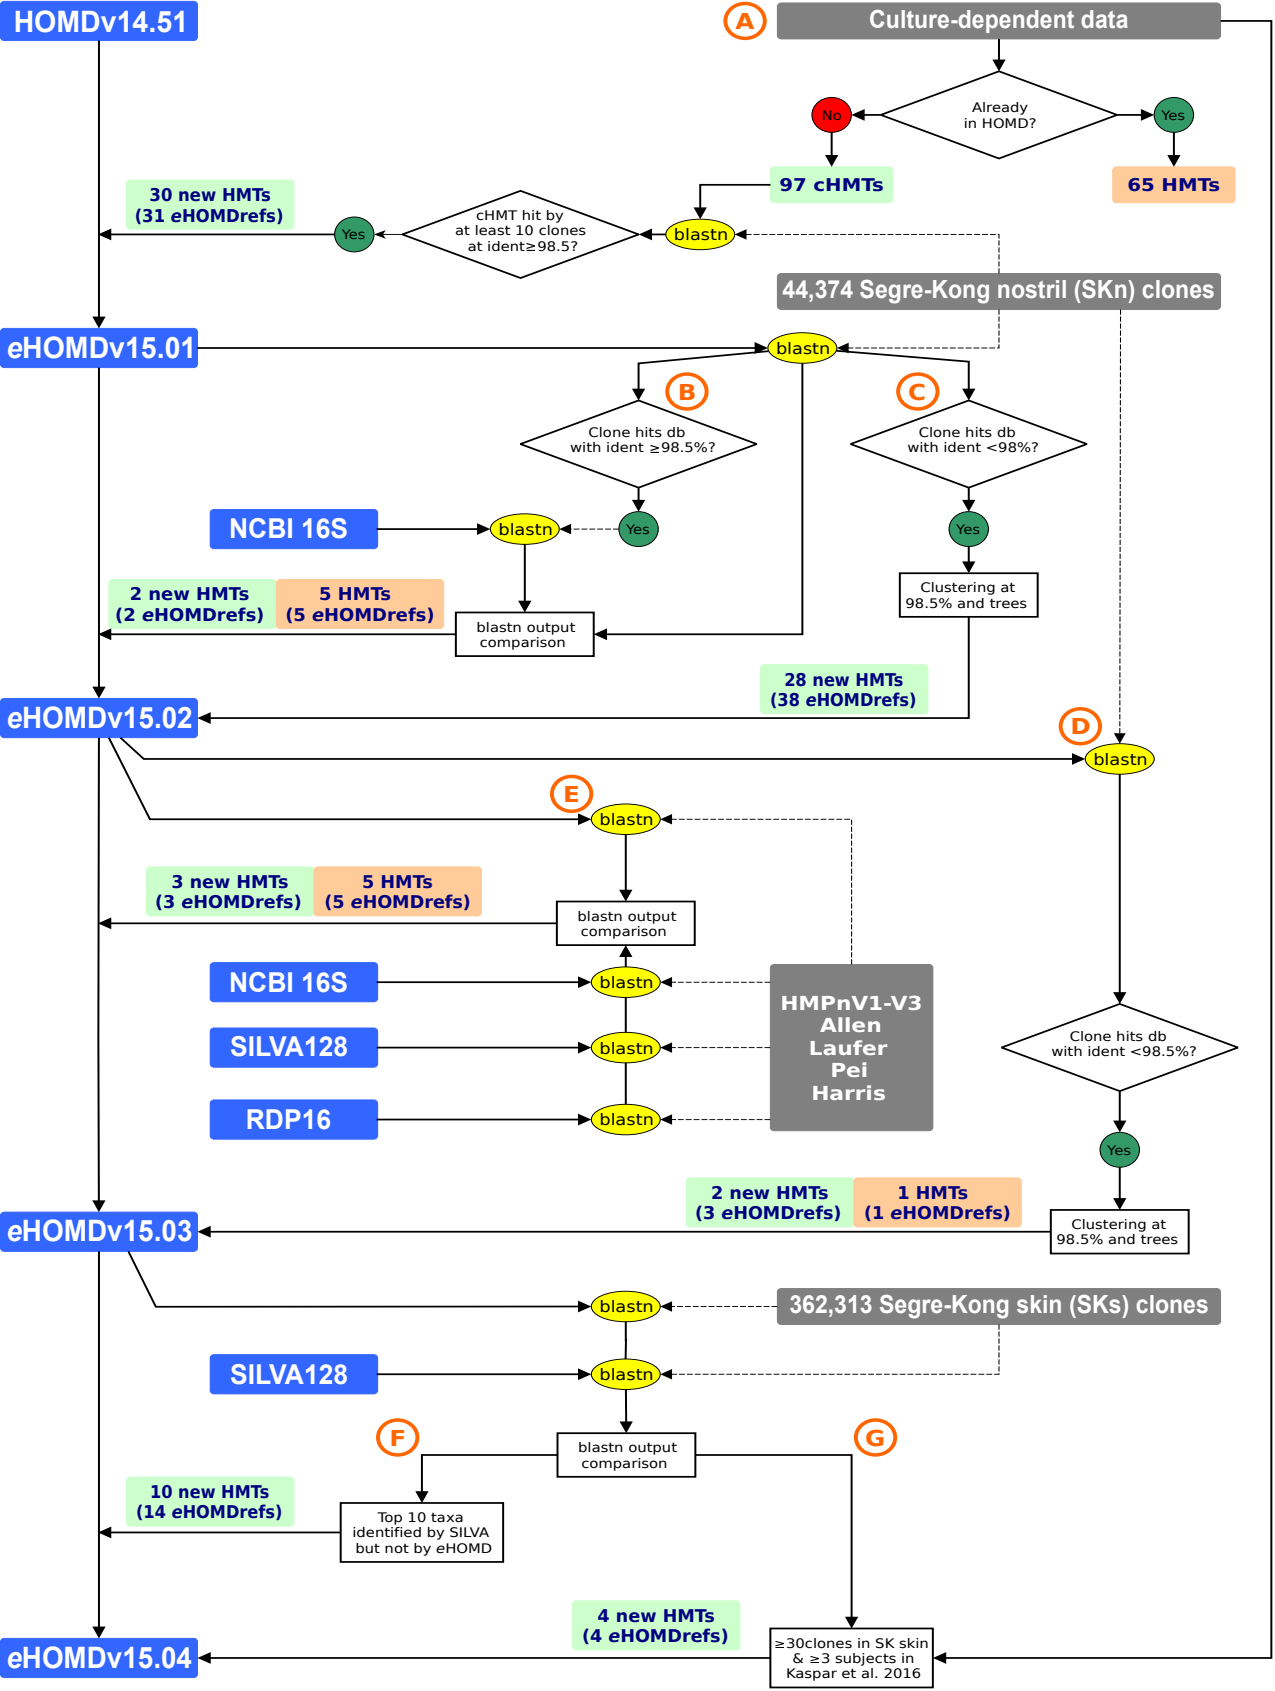

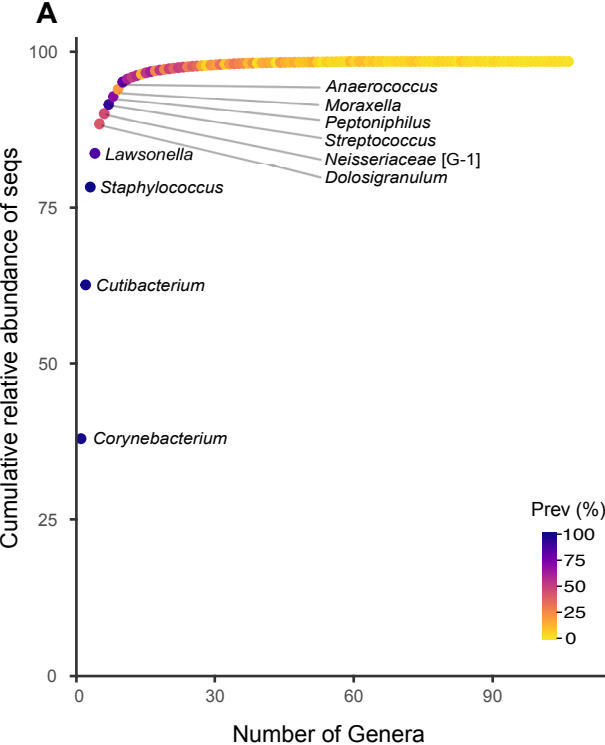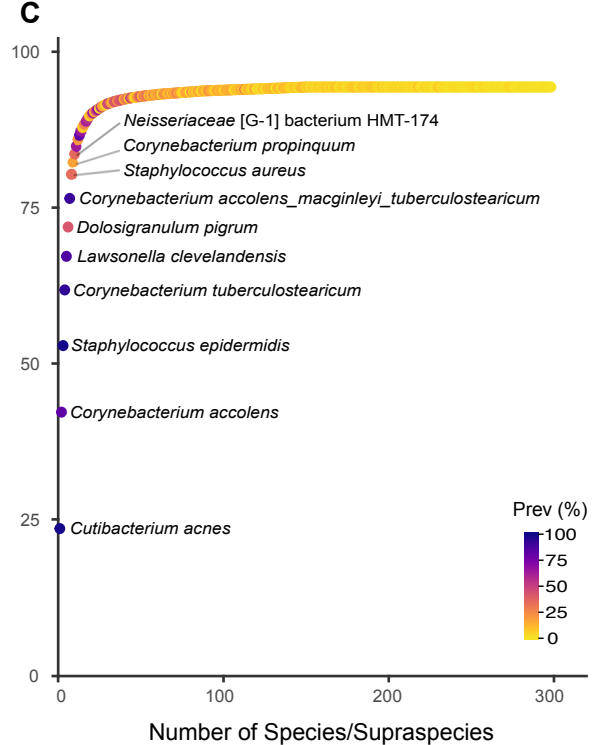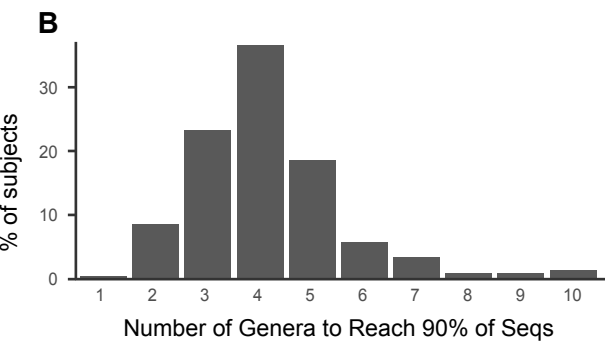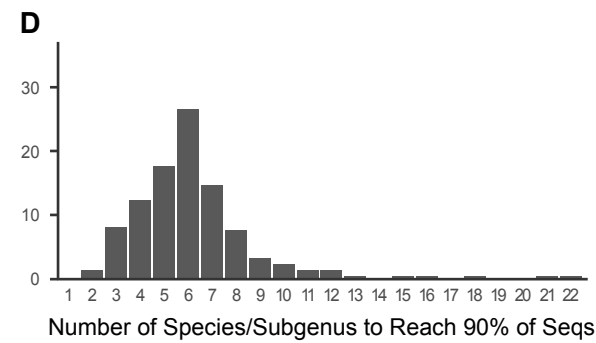



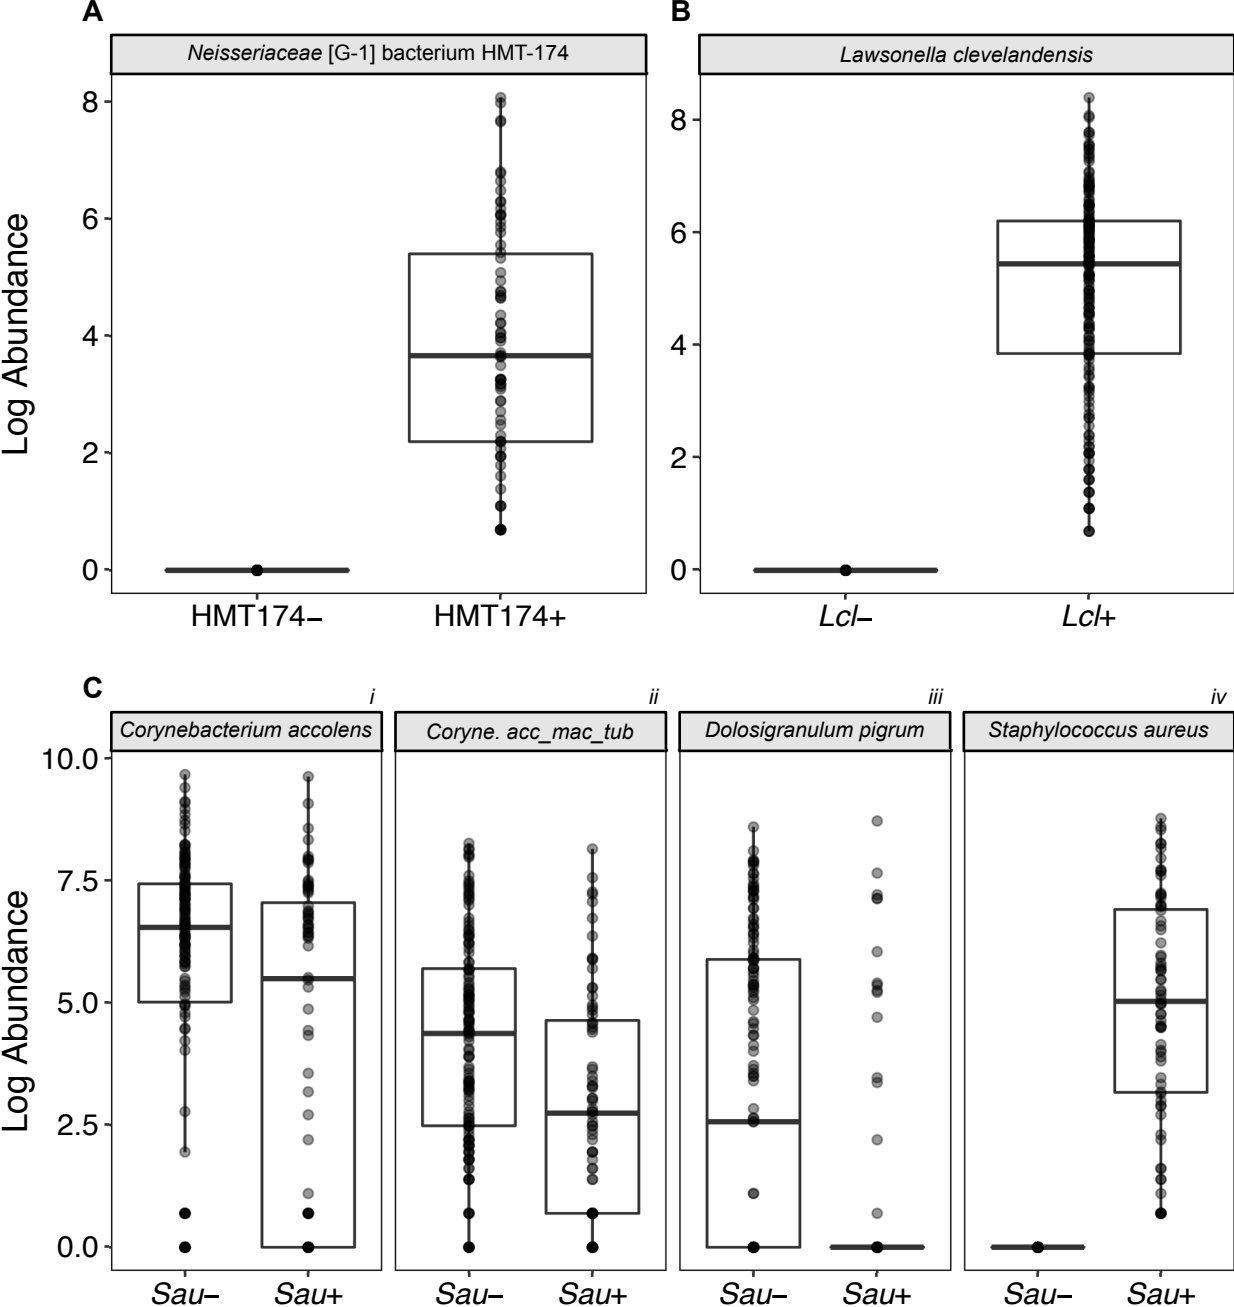

## 1 **SUPPLEMENTAL METHODS**

2 New insights into human nostril microbiome from the *expanded* Human Oral  
3 Microbiome Database (eHOMD): a resource for species-level identification of  
4 microbiome data from the aerodigestive tract

5 Isabel F. Escapa<sup>a,b</sup>, Tsute Chen<sup>a,b\*</sup>, Yanmei Huang<sup>a,b\*</sup>, Prasad Gajare<sup>a</sup>, Floyd E.  
6 Dewhirst<sup>a,b</sup>, Katherine P. Lemon<sup>a,c#</sup>

7

### 8 **Information on the aerodigestive tract microbiome datasets used.**

9 Segre, Kong and colleagues have deposited close-to-full-length 16S RNA gene  
10 sequences from clone libraries collected from different skin sites, including the nostrils  
11 (nares) at NCBI under BioProjects PRJNA46333 and PRJNA30125 (1-6). We  
12 downloaded a total of 413,606 sequences from these BioProjects on May 11, 2017. The  
13 sequences were screened for bacterial 16S rRNA gene sequences only and parsed into  
14 two datasets: the SK nostril dataset (SKn), which includes 44,374 sequences from  
15 nostril samples with a mean length of 1354 bp (min. 1233, max. 1401); and the SK skin  
16 dataset (SKs), which includes 362,313 sequences with a mean length of 1356 bp (min.  
17 1161, max. 1410). The SKs dataset includes 16S rRNA clone sequences derived from  
18 20 non-nasal skin sites, including the alar crease, antecubital fossa, axillary vault, back,  
19 buttock, elbow, external auditory canal, glabella, gluteal crease, hypothenar palm,  
20 inguinal crease, interdigital web space, manubrium, occiput, plantar heel, popliteal  
21 fossa, retroauricular crease, toe web space, umbilicus and volar forearm.

22 The Human Microbiome Project (HMP) Data Coordination Center performed baseline  
23 processing and analysis of all 16S rRNA gene variable region sequences generated  
24 from >10,000 samples from healthy human subjects (7, 8). Table  
25 "HM16STR\_healthy.csv" summarizes all the information for the 9811 files included in  
26 the dataset (<https://www.hmpdacc.org/hmp/HM16STR/healthy/>). We downloaded the  
27 586 files labelled "anterior\_nares" from the corresponding url identified in the same  
28 table. The downloaded files contain V1-V3, V3-V5 and V6-V9 data, therefore the reads  
29 were filtered based on the primer information recorded in each read header, resulting in  
30 a total of 3,458,862 "anterior\_nares" V1-V3 reads corresponding to 363 samples from  
31 227 subjects. (See Methods for why the cohort used for species-level reanalysis  
32 included 210 subjects). We selected the 2,351,347 reads (67.9%) with length  $\geq 430$  and  
33  $\leq 652$  bp (the range of the V1-V3 16S rRNA gene region in HOMDv14.51). After *de novo*  
34 chimera removal with UCHIME in QIIME 1 (9, 10) (`identify_chimeric_seqs.py -m`  
35 `usearch61`), there were 2,338,563 sequences for use. This dataset, dubbed HMPnV1-  
36 V3, was the starting point used to query the performance of the provisional versions of  
37 eHOMD and was the input for species-level reanalysis (see Methods).

38 Laufer et al. analyzed nostril swabs collected from 108 children ages 6 to 78 months in  
39 Philadelphia, PA between December 9, 2008 and January 2, 2009 for cultivation of  
40 *Streptococcus pneumoniae* and DNA harvest (11). Of these, 44% were culture positive  
41 for *S. pneumoniae* and 23% were diagnosed with otitis media. 16S rRNA gene V1-V2  
42 sequences were generated using Roche/454 with primers 27F and 338R. We obtained  
43 184,685 sequences from the authors, of which 94% included sequence matching primer  
44 338R and 1% included sequence matching primer 27F. Therefore, we performed

45 demultiplexing in QIIME 1 (`split_libraries.py`) filtering reads for those  $\geq 250$  bp in length,  
46 quality score  $\geq 30$  and with barcode type `hamming_8`. We also eliminated sequences  
47 from samples for which there was no metadata ( $n=108$  for metadata) leaving 120,963  
48 sequences on which we performed *de novo* chimera removal with UCHIME in QIIME 1  
49 (`identify_chimeric_seqs.py -m usearch61`) (9, 10), yielding the 120,274 16S rRNA V1-  
50 V2 sequences used here.

51 Allen et al. collected nasal lavage fluid samples from 10 participants before, during and  
52 after experimental nasal inoculation with rhinovirus (12). 16S rRNA V1-V3 sequences  
53 were generated using 454-FLX platform and primers 27F and 534R. We obtained  
54 99,095 sequences from the authors of which 77,322 (78%) passed a length filter of  
55  $\geq 300$  bp. After *de novo* chimera removal in with UCHIME in QIIME 1  
56 (`identify_chimeric_seqs.py -m usearch61`) (9, 10), there were 75,310 sequences for use  
57 in this study.

58 Pei et al. (2004) collected distal esophageal biopsies from four participants undergoing  
59 esophagogastroduodenoscopy for upper gastrointestinal complaints whose samples  
60 showed healthy esophageal tissue without evidence of pathology (13). From each of  
61 these, they generated ten 16s rRNA gene clone libraries from independent  
62 amplifications using two different primer pairs: 1) 318 to 1,519 with inosine at  
63 ambiguous positions and 2) from 8 to 1513. Pei et al. (2005) also collected esophageal  
64 biopsies from 24 patients (9 with normal esophageal mucosa, 12 with gastroesophageal  
65 reflux disease (GERD), and 3 with Barrett's esophagus) (14). The Pei et al. 2004-2005  
66 dataset also include all the novel sequences deposited in GenBank from this  
67 subsequent study. We downloaded a total of 7,414 close-to-full-length 16S rRNA gene

68 sequences from GenBank (GB: DQ537536.1 to DQ537935.1 and DQ632752.1 to  
69 DQ639751.1 (PopSet 109141097), AY212255.1 to AY212264.1 (PopSet 28894245),  
70 AY394004.1, AY423746.1, AY423747.1 and AY423748.1).

71 Harris et al. collected bronchoalveolar lavage fluid from children with cystic fibrosis and  
72 generated 16S rRNA clone libraries from these (15). We downloaded these 3203 clones  
73 from GenBank (GB: EU111806.1 to EU112454.1 (PopSet 157058892), DQ188268.1 to  
74 DQ188805.1 (PopSet 77819181) and AY805987.1 to AY808002.1 (PopSet 60499797)).

75 van der Gast et al. generated 16S rRNA gene clone libraries from spontaneously  
76 expectorated sputum samples collected from 14 adults with cystic fibrosis (16). We  
77 downloaded these 2137 clones from GenBank (GB: FM995625.1 to FM997761.1).

78 Flanagan et al. generated 16S rRNA gene clone libraries from daily endotracheal  
79 aspirates collected from seven intubated patients (17). We downloaded these 3278  
80 clones from GenBank (GB: EF508731.1 to EF512008.1).

81 Perkins et al. collected endotracheal tubes from eight adults with mechanical ventilation  
82 to generate 16S rRNA gene clone libraries (18). We downloaded these 1263 clones  
83 from GenBank (GB: FJ557249.1 to FJ558511.1).

#### 84 **Information on the 16S rRNA gene databases used.**

85 The NCBI 16S Microbial database (NCBI 16S) was downloaded from  
86 <ftp://ftp.ncbi.nlm.nih.gov/blast/db/> on May 28, 2017 (19). RDP16  
87 (rdp\_species\_assignment\_16.fa.gz) and SILVA128  
88 (silva\_species\_assignment\_v128.fa.gz) files were downloaded from

89 <https://benjjneb.github.io/dada2/training.html> and converted to BLAST databases using  
90 “makeblastdb” from the NCBI blast 2.6.0+ package  
91 (<https://www.ncbi.nlm.nih.gov/books/NBK279690/>) (20-22).

92 Greengenes GOLD was used instead of Greengenes because only 22.6% of 16S rRNA  
93 gene sequences in Greengenes had complete taxonomic information to the species  
94 level, whereas for 77.4% of the sequences the 7<sup>th</sup> (species) level was listed simply as  
95 “s\_\_”. In contrast, in Greengenes GOLD all sequences included 7 levels of taxonomic  
96 information, as needed for species-level identification. The Greengenes GOLD was  
97 downloaded from  
98 [http://greengenes.lbl.gov/Download/Sequence\\_Data/Fasta\\_data\\_files/gold\\_strains\\_gg1](http://greengenes.lbl.gov/Download/Sequence_Data/Fasta_data_files/gold_strains_gg16S_aligned.fasta.gz)  
99 [6S\\_aligned.fasta.gz](http://greengenes.lbl.gov/Download/Sequence_Data/Fasta_data_files/gold_strains_gg16S_aligned.fasta.gz). The total number of sequences in the database is 5441 (six of the  
100 entries in the fasta file consisted only of a header without data, thus were removed).  
101 The aligned fasta file was converted to a nonaligned file by removing all "." and "-", and  
102 further converted to a BLAST database using “makeblastdb” as above.

### 103 **Addition of 16S rRNA sequences to the eHOMD alignment.**

104 eHOMD maintains an alignment of all its reference 16S rRNA sequences. This  
105 alignment is based on the 16S rRNA secondary structure and is performed manually on  
106 a custom sequence editor (written in QuickBasic and available from Floyd E. Dewhirst  
107 at [fdewhirst@forsyth.org](mailto:fdewhirst@forsyth.org)). The corresponding alignment, in phylogenetic order, for each  
108 release of HOMD/eHOMD can be downloaded at  
109 <http://www.homd.org/?name=seqDownload&type=R>.

### 110 **Clustering sequences at $\geq 98.5\%$ and generating phylogenetic trees.**

111 We performed blastn with an all-by-all search of the input sequences (Fig. 1C and 1D).  
112 The blastn results were used to cluster the sequences into operational taxonomic units  
113 (OTUs) based on percent sequence identity and alignment coverage. Specifically, all  
114 sequences were first sorted by size (seq\_sort\_len.fasta) in descending order and  
115 binned into operational taxonomic units (OTUs) at  $\geq 98.5\%$  identity across  $\geq 99\%$   
116 coverage from longest to shortest sequences. If any subsequent sequence matched a  
117 previous sequence at  $\geq 98.5\%$  with coverage of  $\geq 99\%$ , the subsequent sequence was  
118 binned together with the previous sequence. If the subsequent sequence did not match  
119 any previous sequence, it was placed in new bin (i.e., 98.5% OTU). If the subsequent  
120 sequences matched multiple previous sequences that belong to more than one OTU,  
121 the subsequent sequence was binned to multiple OTUs, and at the same time, we  
122 formed a meta-OTU (M-OTU) linking these OTUs together. Next, we extracted  
123 sequences from each M-OTU and saved to individual fasta files. We then performed  
124 sequence alignment using software MAFFT (23) (V7.407) for each M-OTU fasta file and  
125 constructed phylogenetic trees for each M-OTU. The trees were built using FastTree  
126 (v2.1.10.Dbl), which estimates nucleotide evolution with the Jukes-Cantor model and  
127 infers phylogenetic trees based on approximately maximum-likelihood (24). We  
128 organized the trees by using the longest branch as root and ordered from fewest nodes  
129 to more subnodes.

### 130 **Additional information for candidate HMTs (cHMTs).**

131 Of the 97 cHMTs for addition to HOMD, 82 are present in a nasal culturome of 34  
132 participants (Table S1A, column E), 18 with evidence of chronic nasal inflammation and  
133 16 without evidence of nasal/systemic inflammation, based on swabs taken during nasal

134 surgery from the anterior and posterior nasal vestibule (skin surface inside the nostrils)  
135 and the inferior and middle meatuses (25). Of the other 15 cHMTs we found 7 only in a  
136 report of cultivation of intraoperative mucosal swabs from 38 participants with chronic  
137 rhinosinusitis (CRS) versus 6 controls (26); 7 only in sputa from 50 adults with CF (27);  
138 and 1 only in a report of the aerobic bacteria collected via a mucosal swab of the inferior  
139 turbinate and via a nasal wash from each of 10 healthy adults (28).

#### 140 **Evaluation of Computational Efficiency**

141 We randomly extracted ten 16S rRNA gene full length reads from the SKn dataset for  
142 use as query in a blastn vs. the different databases. We ran the blast 2.6.0+ command:  
143 “blastn -db YOURDATABASEHERE -query YOURQUERYFILEHERE -out OUTPUT.txt  
144 -outfmt "10 std qcovs salltitles" -max\_target\_seqs 1” using a single processor thread on  
145 a computer with the Intel Xeon CPU (X5675 @ 3.07GHZ with 24 Gb memory). We  
146 used Linux shell command “time” before the blastn command to record the running  
147 time.

148

#### 149 **References for the Supplemental Methods**

- 150 1. Grice EA, Kong HH, Conlan S, Deming CB, Davis J, Young AC, Bouffard GG,  
151 Blakesley RW, Murray PR, Green ED, Turner ML, Segre JA. 2009. Topographical  
152 and temporal diversity of the human skin microbiome. *Science* 324:1190-2.
- 153 2. Kong HH, Oh J, Deming C, Conlan S, Grice EA, Beatson MA, Nomicos E, Polley  
154 EC, Komarow HD, Murray PR, Turner ML, Segre JA. 2012. Temporal shifts in the  
155 skin microbiome associated with disease flares and treatment in children with  
156 atopic dermatitis. *Genome research* 22:850-9.
- 157 3. Oh J, Conlan S, Polley EC, Segre JA, Kong HH. 2012. Shifts in human skin and  
158 nares microbiota of healthy children and adults. *Genome medicine* 4:77.
- 159 4. Findley K, Oh J, Yang J, Conlan S, Deming C, Meyer JA, Schoenfeld D, Nomicos  
160 E, Park M, Kong HH, Segre JA. 2013. Topographic diversity of fungal and bacterial  
161 communities in human skin. *Nature* 498:367-70.



- 162 5. Oh J, Freeman AF, Park M, Sokolic R, Candotti F, Holland SM, Segre JA, Kong  
163 HH. 2013. The altered landscape of the human skin microbiome in patients with  
164 primary immunodeficiencies. *Genome research* 23:2103-14.
- 165 6. Oh J, Byrd AL, Deming C, Conlan S, Kong HH, Segre JA. 2014. Biogeography and  
166 individuality shape function in the human skin metagenome. *Nature* 514:59-64.
- 167 7. Human Microbiome Project C. 2012. Structure, function and diversity of the healthy  
168 human microbiome. *Nature* 486:207-14.
- 169 8. Human Microbiome Project C. 2012. A framework for human microbiome research.  
170 *Nature* 486:215-21.
- 171 9. Caporaso JG, Kuczynski J, Stombaugh J, Bittinger K, Bushman FD, Costello EK,  
172 Fierer N, Pena AG, Goodrich JK, Gordon JI, Huttley GA, Kelley ST, Knights D,  
173 Koenig JE, Ley RE, Lozupone CA, McDonald D, Muegge BD, Pirrung M, Reeder  
174 J, Sevinsky JR, Turnbaugh PJ, Walters WA, Widmann J, Yatsunencko T, Zaneveld  
175 J, Knight R. 2010. QIIME allows analysis of high-throughput community  
176 sequencing data. *Nat Methods* 7:335-6.
- 177 10. Edgar RC, Haas BJ, Clemente JC, Quince C, Knight R. 2011. UCHIME improves  
178 sensitivity and speed of chimera detection. *Bioinformatics* 27:2194-200.
- 179 11. Laufer AS, Metlay JP, Gent JF, Fennie KP, Kong Y, Pettigrew MM. 2011. Microbial  
180 communities of the upper respiratory tract and otitis media in children. *MBio*  
181 2:e00245-10.
- 182 12. Allen EK, Koeppl AF, Hendley JO, Turner SD, Winther B, Sale MM. 2014.  
183 Characterization of the nasopharyngeal microbiota in health and during rhinovirus  
184 challenge. *Microbiome* 2:22.
- 185 13. Pei Z, Bini EJ, Yang L, Zhou M, Francois F, Blaser MJ. 2004. Bacterial biota in the  
186 human distal esophagus. *Proc Natl Acad Sci U S A* 101:4250-5.
- 187 14. Pei Z, Yang L, Peek RM, Jr Levine SM, Pride DT, Blaser MJ. 2005. Bacterial biota  
188 in reflux esophagitis and Barrett's esophagus. *World J Gastroenterol* 11:7277-83.
- 189 15. Harris JK, De Groote MA, Sagel SD, Zemanick ET, Kapsner R, Penvari C, Kaess  
190 H, Deterding RR, Accurso FJ, Pace NR. 2007. Molecular identification of bacteria  
191 in bronchoalveolar lavage fluid from children with cystic fibrosis. *Proc Natl Acad  
192 Sci U S A* 104:20529-33.
- 193 16. van der Gast CJ, Walker AW, Stressmann FA, Rogers GB, Scott P, Daniels TW,  
194 Carroll MP, Parkhill J, Bruce KD. 2011. Partitioning core and satellite taxa from  
195 within cystic fibrosis lung bacterial communities. *ISME J* 5:780-91.
- 196 17. Flanagan JL, Brodie EL, Weng L, Lynch SV, Garcia O, Brown R, Hugenholtz P,  
197 DeSantis TZ, Andersen GL, Wiener-Kronish JP, Bristow J. 2007. Loss of bacterial  
198 diversity during antibiotic treatment of intubated patients colonized with  
199 *Pseudomonas aeruginosa*. *J Clin Microbiol* 45:1954-62.
- 200 18. Perkins SD, Woeltje KF, Angenent LT. 2010. Endotracheal tube biofilm inoculation  
201 of oral flora and subsequent colonization of opportunistic pathogens. *Int J Med  
202 Microbiol* 300:503-11.
- 203 19. O'Leary NA, Wright MW, Brister JR, Ciufo S, Haddad D, McVeigh R, Rajput B,  
204 Robbertse B, Smith-White B, Ako-Adjei D, Astashyn A, Badretin A, Bao Y,  
205 Blinkova O, Brover V, Chetvernin V, Choi J, Cox E, Ermolaeva O, Farrell CM,  
206 Goldfarb T, Gupta T, Haft D, Hatcher E, Hlavina W, Joardar VS, Kodali VK, Li W,  
207 Maglott D, Masterson P, McGarvey KM, Murphy MR, O'Neill K, Pujar S, Rangwala

- 208 SH, Rausch D, Riddick LD, Schoch C, Shkeda A, Storz SS, Sun H, Thibaud-  
209 Nissen F, Tolstoy I, Tully RE, Vatsan AR, Wallin C, Webb D, Wu W, Landrum MJ,  
210 Kimchi A, et al. 2016. Reference sequence (RefSeq) database at NCBI: current  
211 status, taxonomic expansion, and functional annotation. *Nucleic Acids Res*  
212 44:D733-45.
- 213 20. Cole JR, Wang Q, Fish JA, Chai B, McGarrell DM, Sun Y, Brown CT, Porras-Alfaro  
214 A, Kuske CR, Tiedje JM. 2014. Ribosomal Database Project: data and tools for  
215 high throughput rRNA analysis. *Nucleic Acids Res* 42:D633-42.
- 216 21. Yilmaz P, Parfrey LW, Yarza P, Gerken J, Pruesse E, Quast C, Schweer T, Peplies  
217 J, Ludwig W, Glockner FO. 2014. The SILVA and "All-species Living Tree Project  
218 (LTP)" taxonomic frameworks. *Nucleic Acids Res* 42:D643-8.
- 219 22. Quast C, Pruesse E, Yilmaz P, Gerken J, Schweer T, Yarza P, Peplies J, Glockner  
220 FO. 2013. The SILVA ribosomal RNA gene database project: improved data  
221 processing and web-based tools. *Nucleic Acids Res* 41:D590-6.
- 222 23. Katoh K, Asimenos G, Toh H. 2009. Multiple alignment of DNA sequences with  
223 MAFFT. *Methods Mol Biol* 537:39-64.
- 224 24. Price MN, Dehal PS, Arkin AP. 2010. FastTree 2--approximately maximum-  
225 likelihood trees for large alignments. *PLoS One* 5:e9490.
- 226 25. Kaspar U, Kriegeskorte A, Schubert T, Peters G, Rudack C, Pieper DH, Wos-Oxley  
227 M, Becker K. 2016. The culturome of the human nose habitats reveals individual  
228 bacterial fingerprint patterns. *Environ Microbiol* 18:2130-42.
- 229 26. Boase S, Foreman A, Cleland E, Tan L, Melton-Kreft R, Pant H, Hu FZ, Ehrlich  
230 GD, Wormald PJ. 2013. The microbiome of chronic rhinosinusitis: culture,  
231 molecular diagnostics and biofilm detection. *BMC Infect Dis* 13:210.
- 232 27. Tunney MM, Field TR, Moriarty TF, Patrick S, Doering G, Muhlebach MS,  
233 Wolfgang MC, Boucher R, Gilpin DF, McDowell A, Elborn JS. 2008. Detection of  
234 anaerobic bacteria in high numbers in sputum from patients with cystic fibrosis. *Am*  
235 *J Respir Crit Care Med* 177:995-1001.
- 236 28. Rasmussen TT, Kirkeby LP, Poulsen K, Reinholdt J, Kilian M. 2000. Resident  
237 aerobic microbiota of the adult human nasal cavity. *Apmis* 108:663-75.

## 1 **SUPPLEMENTAL DATA S1**

2 New insights into human nostril microbiome from the *expanded* Human Oral

3 Microbiome Database (eHOMD): a resource for species-level identification of

4 microbiome data from the aerodigestive tract

5 Isabel F. Escapa<sup>a,b</sup>, Tsute Chen<sup>a,b\*</sup>, Yanmei Huang<sup>a,b\*</sup>, Prasad Gajare<sup>a</sup>, Floyd E.

6 Dewhirst<sup>a,b</sup>, Katherine P. Lemon<sup>a,c#</sup>

### 7 **S1A. 16S rRNA gene phylogenetic tree of all of the eHOMD reference sequences**

8 **(eHOMDrefs) in v15.1** (available online at

9 [http://www.homd.org/ftp/publication\\_data/20180919/Supplemental\\_Figures/Figure.S1A](http://www.homd.org/ftp/publication_data/20180919/Supplemental_Figures/Figure.S1A))

10 The 998 16S rRNA gene references sequences were aligned with MAFFT (V7.047) and

11 then subjected to FastTree (version 2.1.10.Dbl) to build a phylogenetic tree. The 111

12 newly added sequences (from 94 taxa) are highlighted in yellow. For each sequence the

13 following information is provided and separated with a vertical bar "|": 1) HMT ID (in

14 blue), 2) sequence ID, 3) scientific name, 4) clone ID, 5) Genbank ID on which the

15 sequence was based, 6) naming status (i.e., named or unnamed phylotype) and 7) body

16 site, if assigned. The latest version of the eHOMD phylogenetic tree is available at

17 [http://www.ehomd.org/ftp/HOMD\\_phylogeny/current](http://www.ehomd.org/ftp/HOMD_phylogeny/current).

### 18 **S1B. 16S rRNA gene tree of *Corynebacterium* reference sequences from both**

19 **SILVA128 and eHOMDv15.1** (available online at

20 [http://www.homd.org/ftp/publication\\_data/20180919/Supplemental\\_Figures/Figure.S1B](http://www.homd.org/ftp/publication_data/20180919/Supplemental_Figures/Figure.S1B))

21 This tree shows all of the SILVA *Corynebacterium* sequences (sequence ID in red)

22 clustered together with the eHOMDv15.1 *Corynebacterium* reference sequences

23 (prefixed with HMT ID in blue and refseq ID in brown). SILVA sequences discussed in  
24 main text are highlighted in yellow and mostly near the bottom of the tree. To generate  
25 the tree, we aligned the 1,359 *Corynebacterium* reference sequences from SILVA128  
26 together with the v15.1 *Corynebacterium* eHOMDRefs using MAFFT (v7.407) and used  
27 the aligned sequences to generate a tree with FastTree (version 2.1.10.Dbl). We  
28 included several eHOMD sequences from neighboring genera as an outgroup (top of  
29 tree). Some of the SILVA128 sequences have deep long branches, e.g.,  
30 KP214641.3.1224 and CP001601.1487755.1489023. These are mostly due to chimeric  
31 sequences some of which include non-16S rRNA fragments (e.g., in the case  
32 of CP001601.1487755.1489023 only the first 906 of 1207 nucleotides match to 16S  
33 rRNA by blastn).

34 **S1C. Phylogenetic tree of 16S rRNA genes from newly added genomes** (available  
35 online at  
36 [http://www.homd.org/ftp/publication\\_data/20180919/Supplemental\\_Figures/Figure.S1C](http://www.homd.org/ftp/publication_data/20180919/Supplemental_Figures/Figure.S1C))

37 The annotated 16S rRNA gene sequences were extracted from the 117 newly added  
38 genomes and were aligned and treed together with the eHOMDv15.1 reference  
39 sequences to illustrate their phylogenetic positions amongst the sequences of known  
40 taxa. If a genome had multiple 16S rRNA gene sequences annotated, only the one with  
41 the highest sequence percent identity was included and highlighted in light green color.  
42 Taxon assignment was based on one or more of the following, with icons adjacent to  
43 each entry indicating which were used: 1) highest percent sequence identity to the  
44 eHOMDrefs v15.1 (blue diamond); 2) phylogenetic position of the 16S rRNA gene  
45 sequence from #1 (light green triangle); and 3) phylogenomic position in Fig. S5 (light

46 orange circle). Other useful genomic information provided is explained in the figure key.  
47 The same genome IDs in the format of SEQFN<sub>NNNN</sub> (where NNNN is a four-digit  
48 number) were denoted in both Fig. S4 and S5 for consistency.

49 **S1D. Phylogenomic tree of the newly added genomes** (available online at  
50 [http://www.homd.org/ftp/publication\\_data/20180919/Supplemental\\_Figures/Figure.S1D](http://www.homd.org/ftp/publication_data/20180919/Supplemental_Figures/Figure.S1D))

51 The annotated protein sequences were extracted from the 117 newly added genomes  
52 and subjected to phylogenomic analysis with PhyloPhlAn (version 0.99) to illustrate their  
53 phylogenetic positions amongst the sequences of known taxa. Newly added genomes  
54 are highlighted in light orange. Taxonomy assignment was based on one or more of the  
55 following, with icons adjacent to each added genome indicating which were used: 1)  
56 highest percent sequence identity to the v15.1 eHOMDrefs (blue diamond); 2)  
57 phylogenetic position of the 16S rRNA gene sequence from #1 in Fig. S4 (light green  
58 triangle); and 3) phylogenomic positions in this figure (light orange circle). Other useful  
59 genomic information provided is explained in the figure key. The same genome IDs in  
60 the format of SEQFN<sub>NNNN</sub> (where NNNN is a four-digit number) are denoted in both Fig.  
61 S4 and S5 for consistency.

62 **S1E. Phylogenetic tree of *Betaproteobacteria* showing the positions of**  
63 ***Neisseriaceae* [G-1] bacterium HMT-174 and HMT-327** (available online at  
64 [http://www.homd.org/ftp/publication\\_data/20180919/Supplemental\\_Figures/Figure.S1E](http://www.homd.org/ftp/publication_data/20180919/Supplemental_Figures/Figure.S1E))

65 To see where the novel genus *Neisseriaceae* [G-1] fell relative other taxa at the family,  
66 class and order level, 10 non-oral sequences (in black font) were added to eHOMD  
67 sequences (in blue and red font) from the class *Betaproteobacteria* and a phylogenetic  
68 tree was generated. Species were selected from the families *Neisseriaceae* and

69 *Chromobacteriaceae* (the two families in the order *Neisseriales*) because some of these  
70 sequences were best hits by simple blastn analysis of the novel *Neisseriaceae* [G-1]  
71 species. The tree was generated by first aligning the sequences with the MAFFT  
72 software (V7.407) and then subjecting them to FastTree (Version 2.1.10.Dbl) with the  
73 default Jukes-Cantor + CAT model for inferring the tree. The scale bar represents  
74 substitutions/site. Order names are marked above the appropriate node and  
75 *Neisseriales* families are indicated with brackets.

A

### % Coverage

bioRxiv preprint doi: <https://doi.org/10.1101/347013>; this version posted October 31, 2018. The copyright holder for this preprint (which was not certified by peer review) is the author/funder, who has granted bioRxiv a license to display the preprint in perpetuity. It is made available under aCC-BY-NC-ND 4.0 International license.

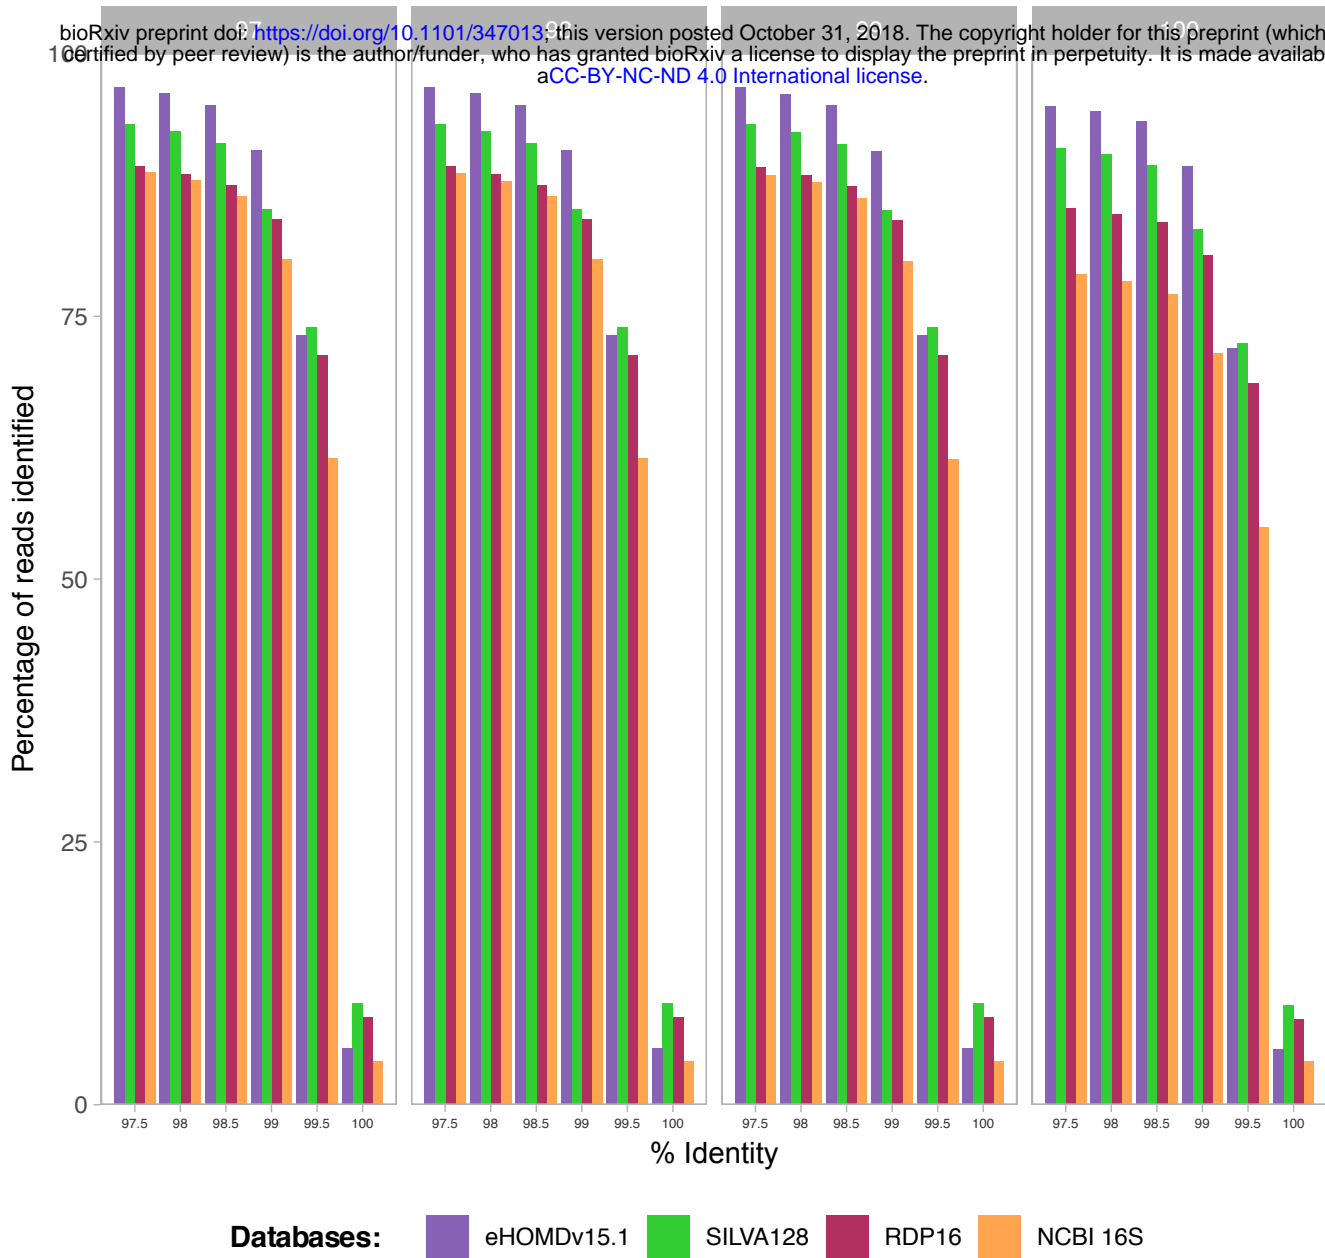

**B****% Coverage**

bioRxiv preprint doi: <https://doi.org/10.1101/347013>; this version posted October 31, 2018. The copyright holder for this preprint (which was not certified by peer review) is the author/funder, who has granted bioRxiv a license to display the preprint in perpetuity. It is made available under aCC-BY-NC-ND 4.0 International license.

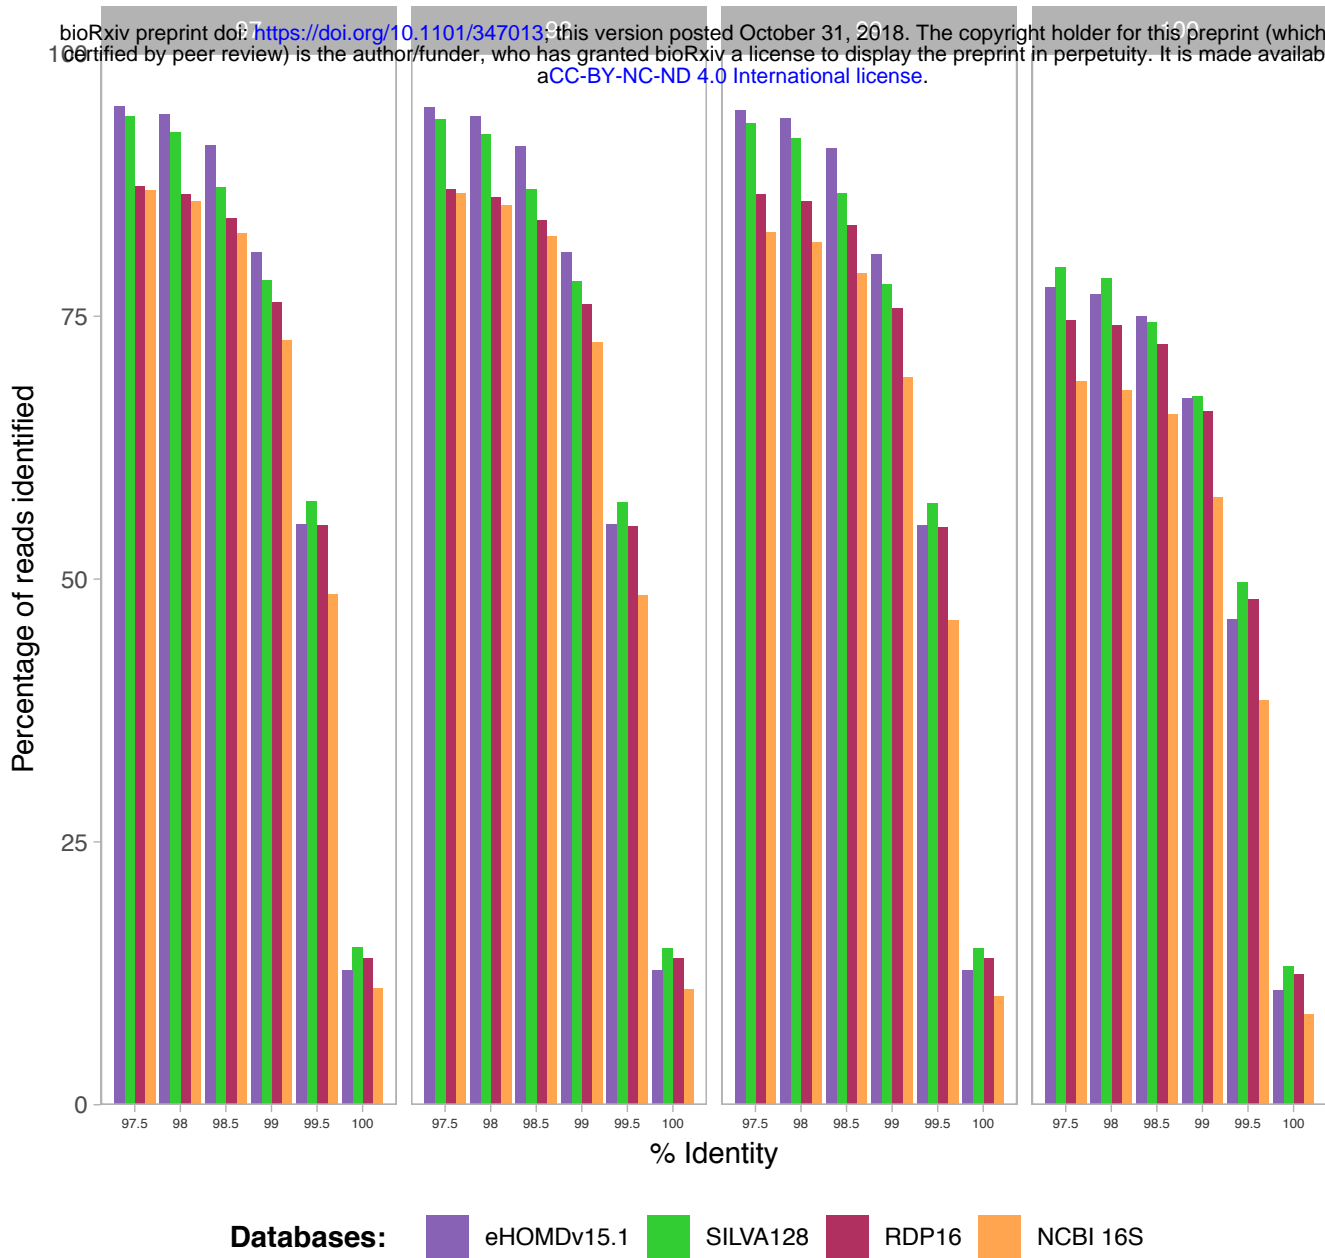

Source: https://www.biorxiv.org/content/10.1101/347013v2.full.pdf
